# Supplementary material
Source: PubMed Central journal article supplement (PMC3641821)
Supplement: NIHMS292428-supplement-1_si_001.pdf [file NIHMS292428-supplement-1_si_001.pdf]

# **Neomycin-Neomycin Dimer: An All Carbohydrate Scaffold with High Affinity for AT Rich DNA Duplexes**

Sunil Kumar, Liang Xue and Dev P. Arya\*

*Laboratory of Medicinal Chemistry, Department of Chemistry, Clemson University, Clemson, SC 29634*

## Supporting Information

### Appendices

1. Characterization of synthesized compounds.....S2-S19
2. Biophysical characterization of **3** with nucleic acids.....S20-S37
3. FID Assay for 512-Member Deoxyoligonucleotide Library...S38-S81

## 1. Characterization of synthesized compounds

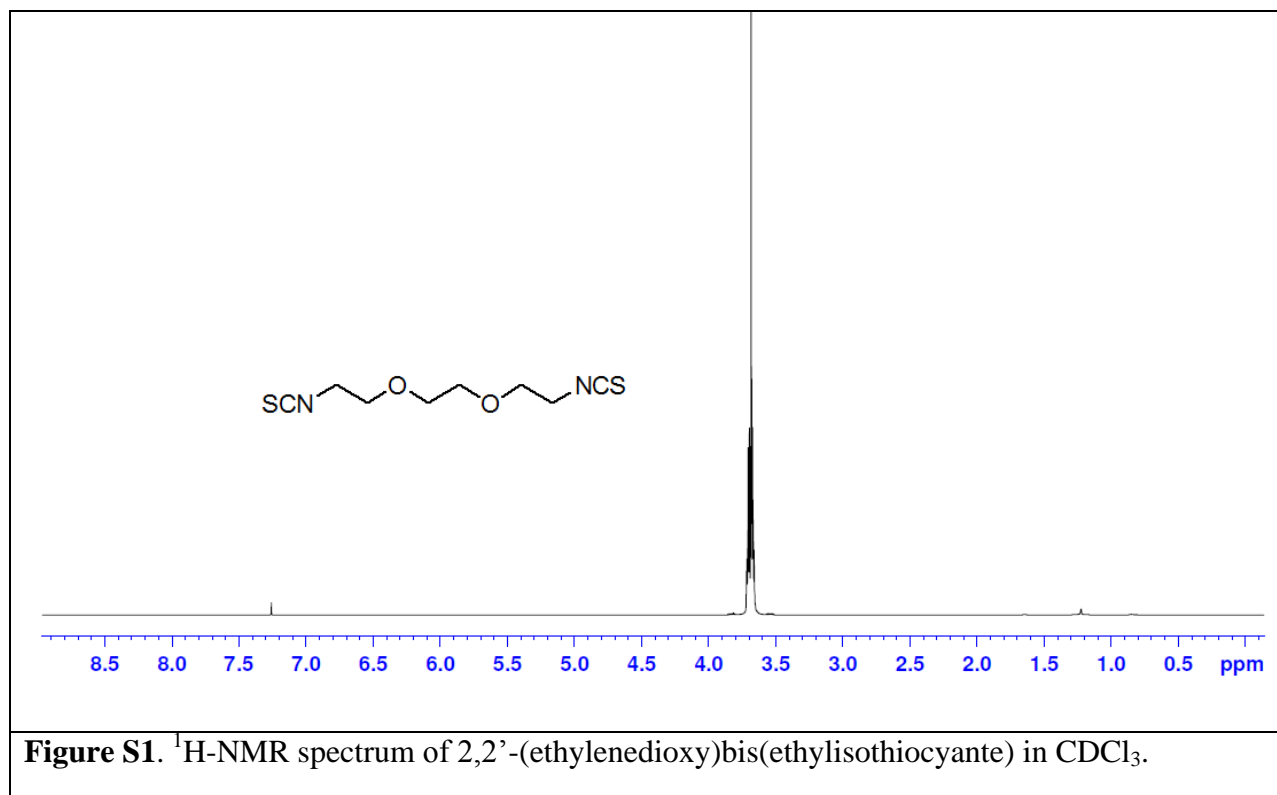

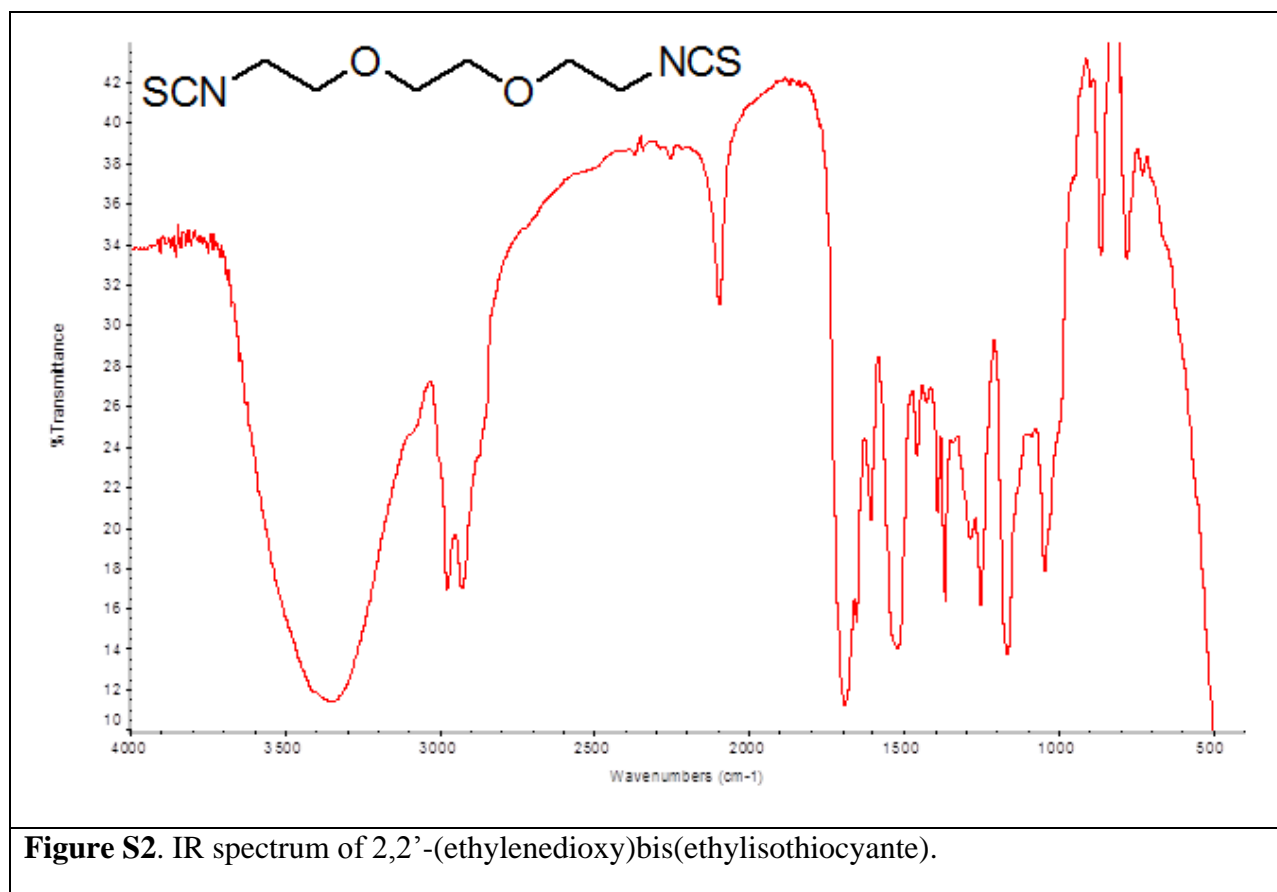

**Figure S2.** IR spectrum of 2,2'-(ethylenedioxy)bis(ethylisothiocyanate).

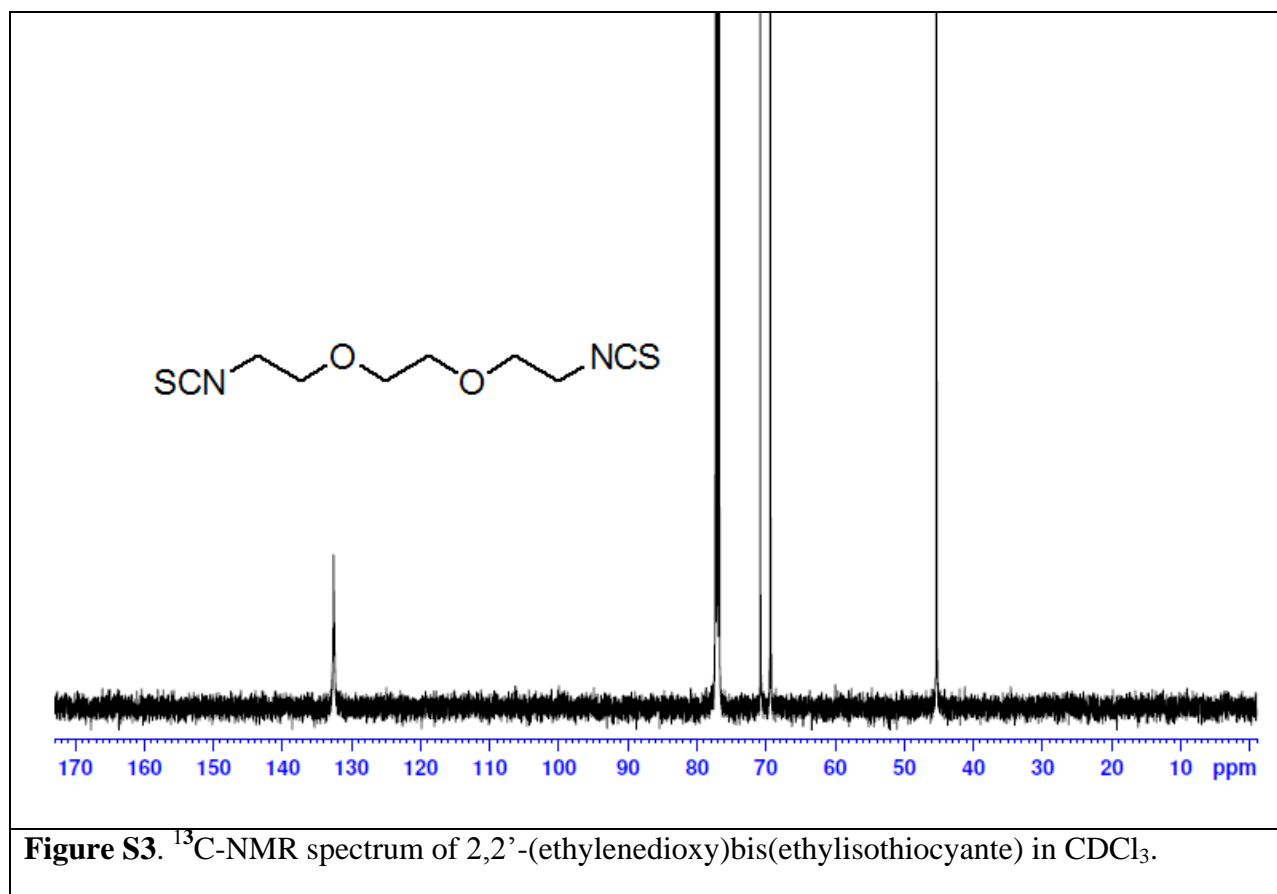

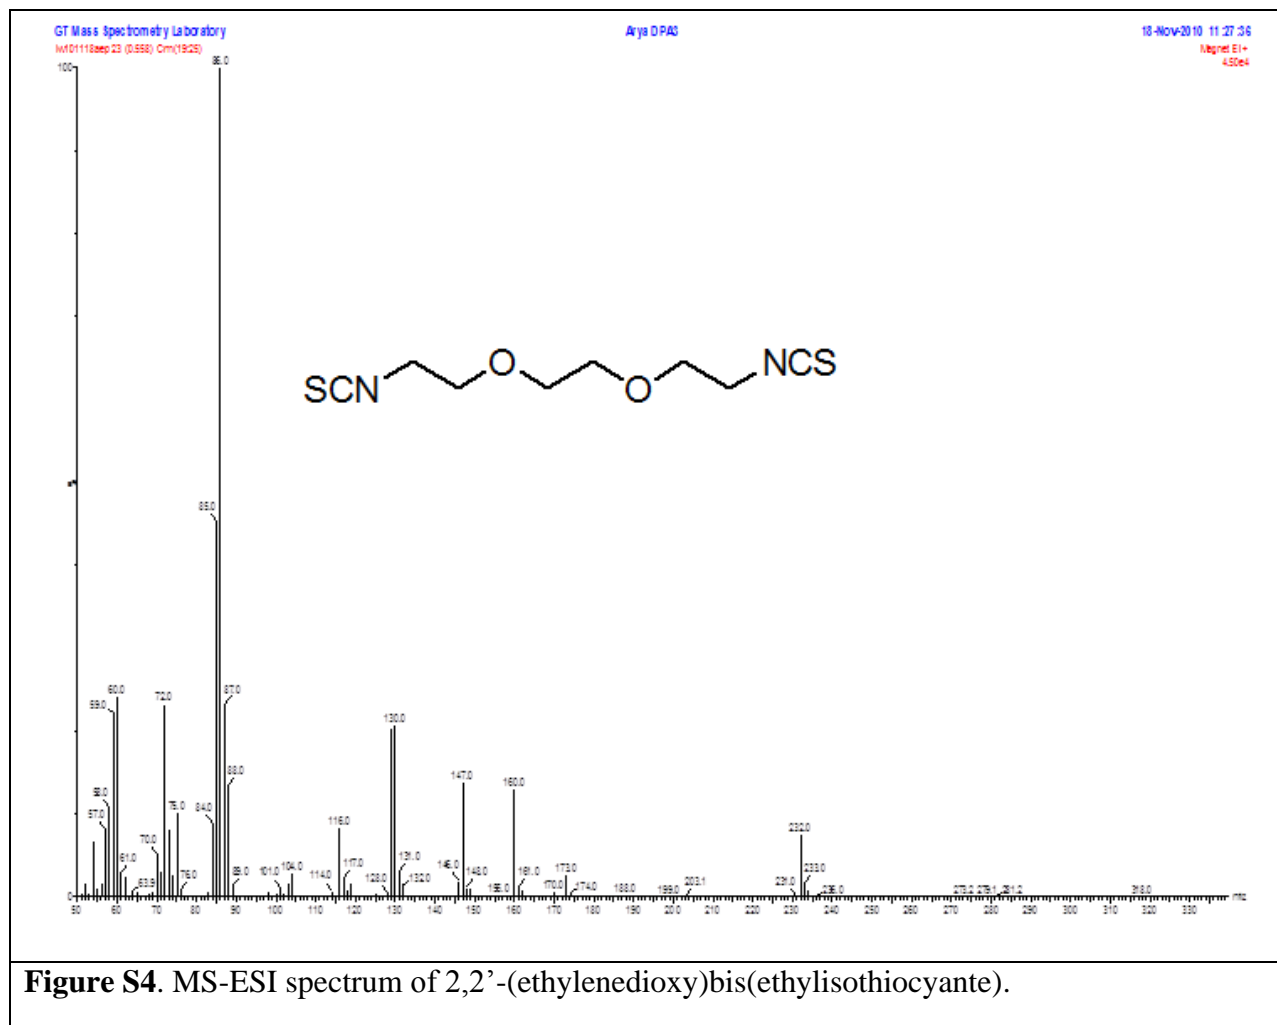

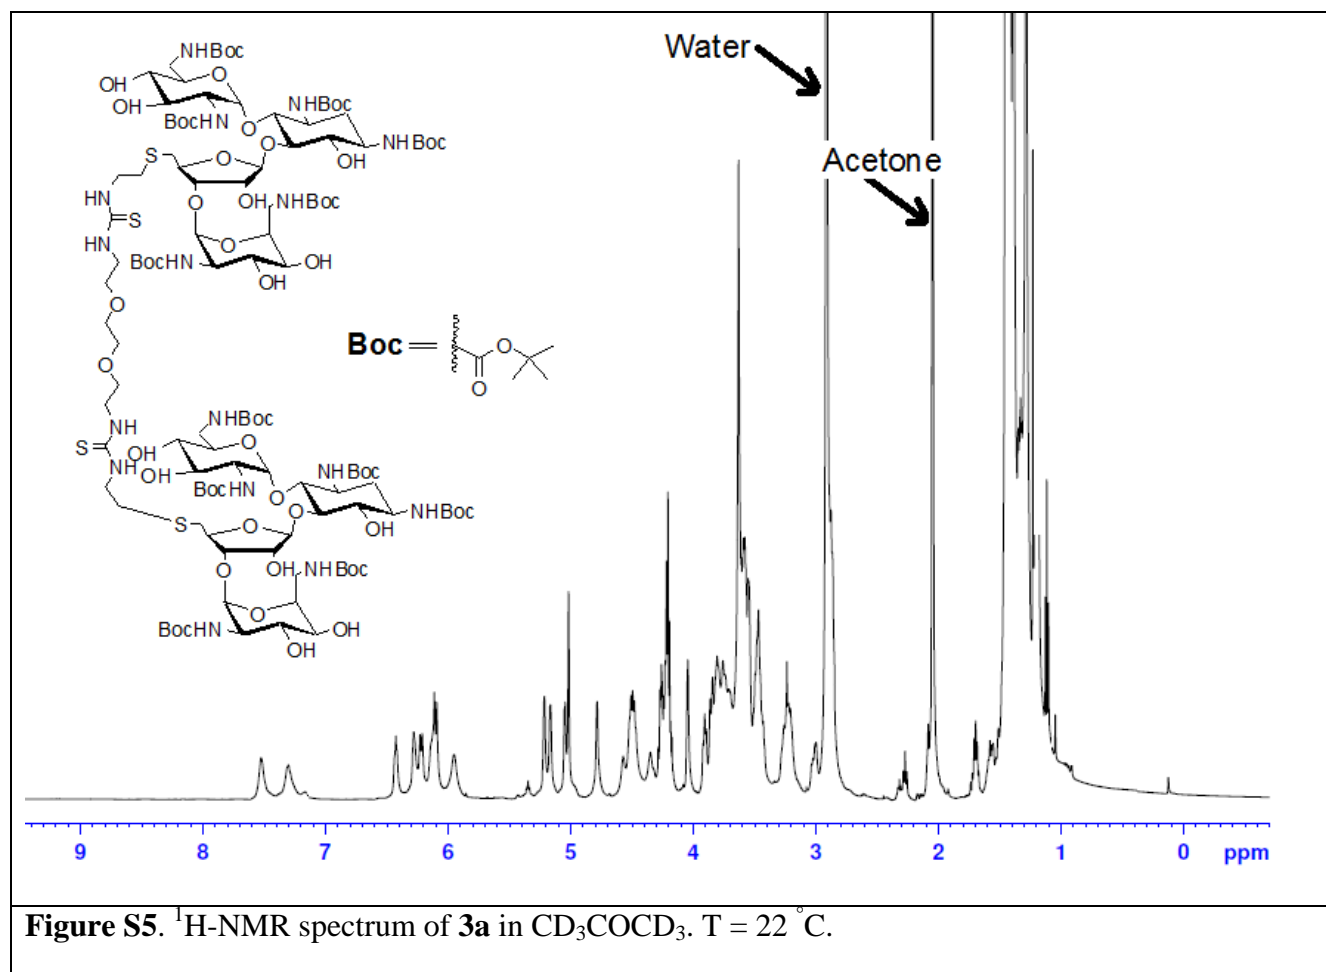

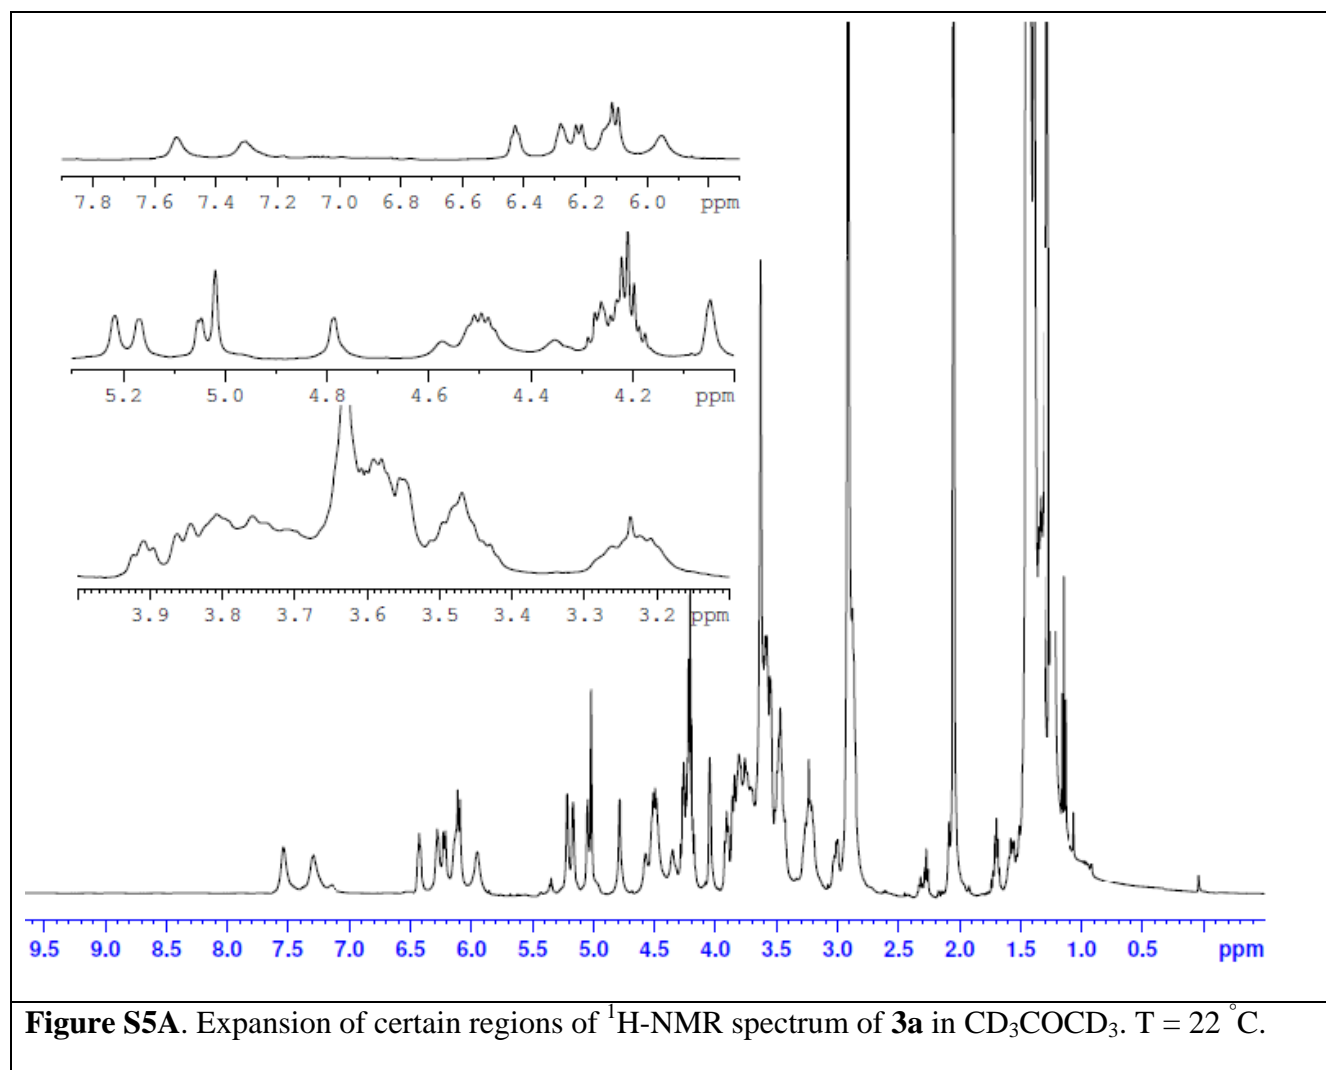

**Figure S5A.** Expansion of certain regions of  $^1\text{H-NMR}$  spectrum of **3a** in  $\text{CD}_3\text{COCD}_3$ .  $T = 22^\circ\text{C}$ .

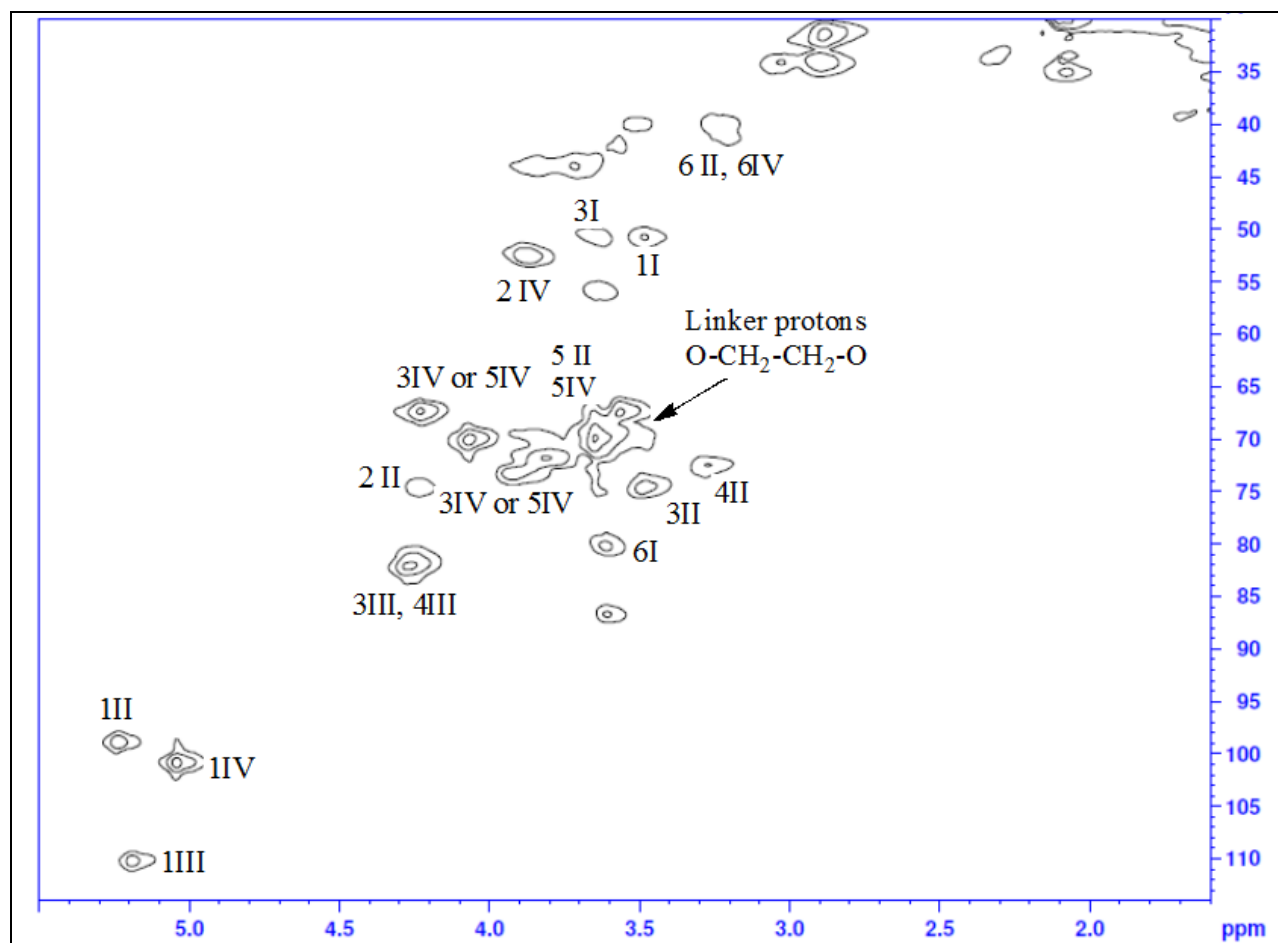

**Figure S5B.** HMQC spectrum of **3a** in  $\text{CD}_3\text{COCD}_3$ .  $T = 22^\circ\text{C}$ . Assignments were made with the help of TOCSY, HMQC, and COSY spectra.



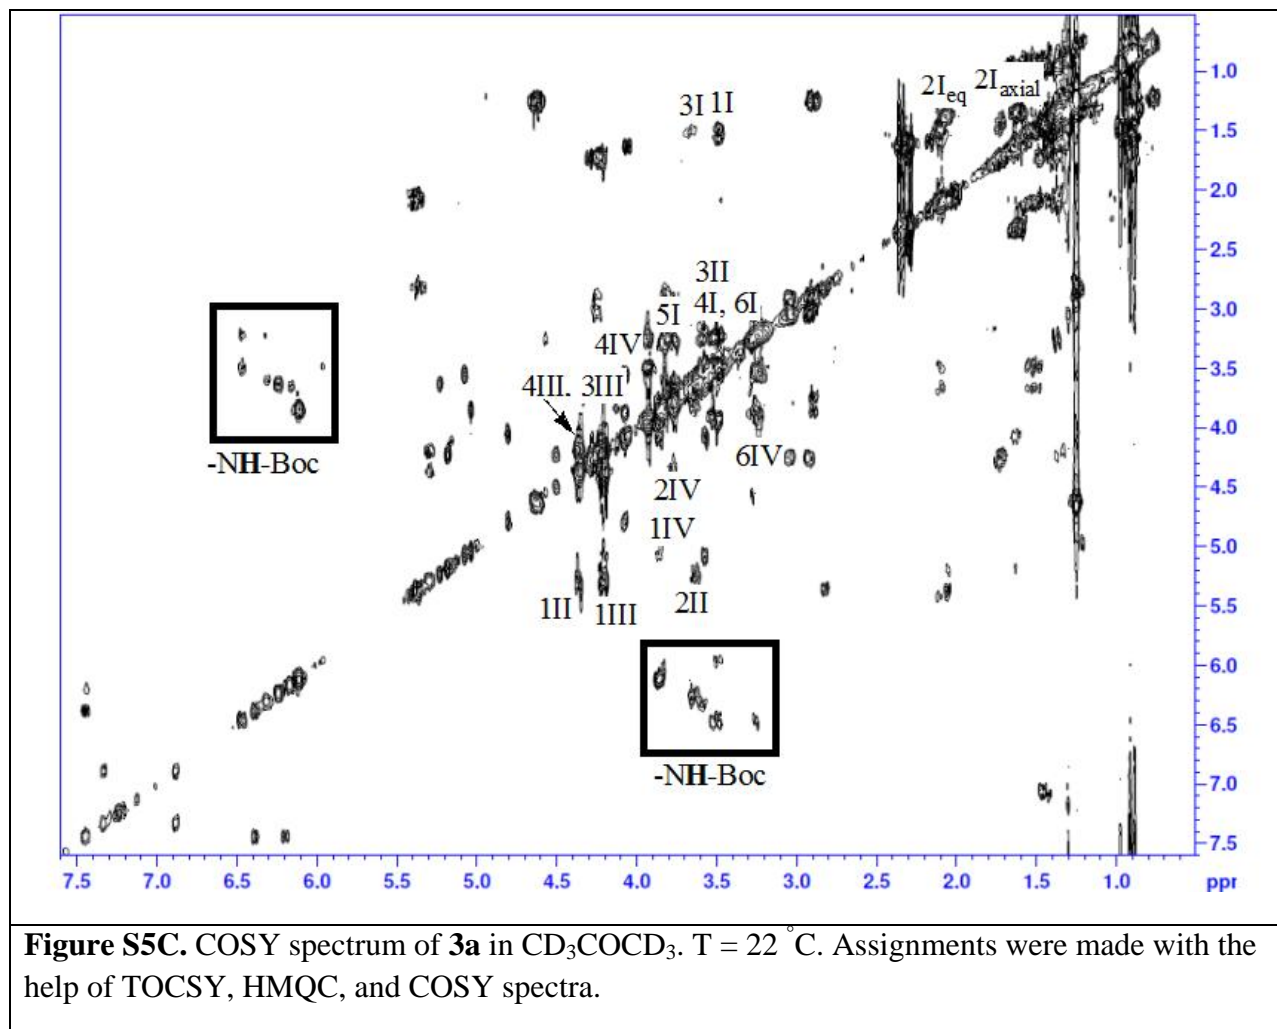

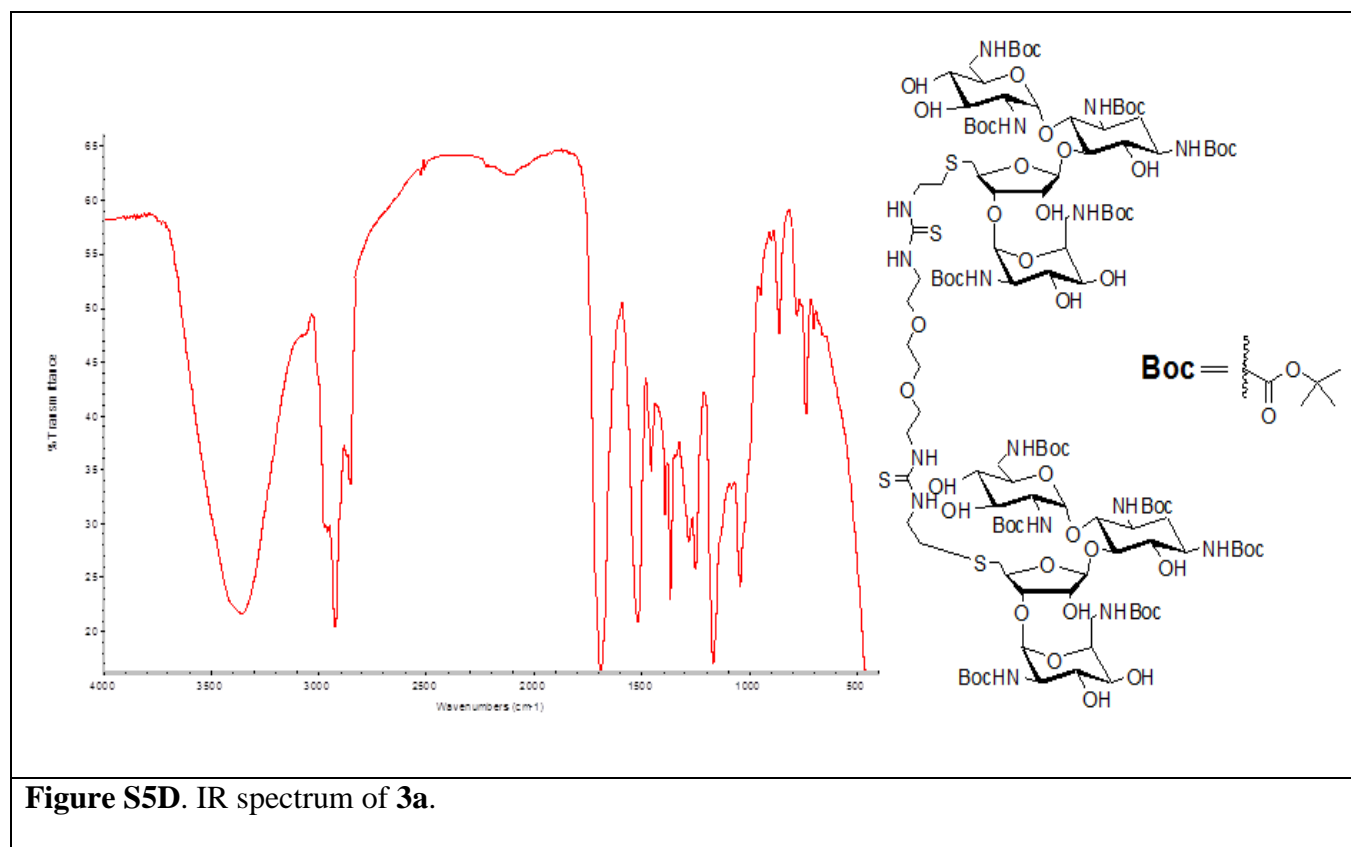

**Figure S5D.** IR spectrum of **3a**.

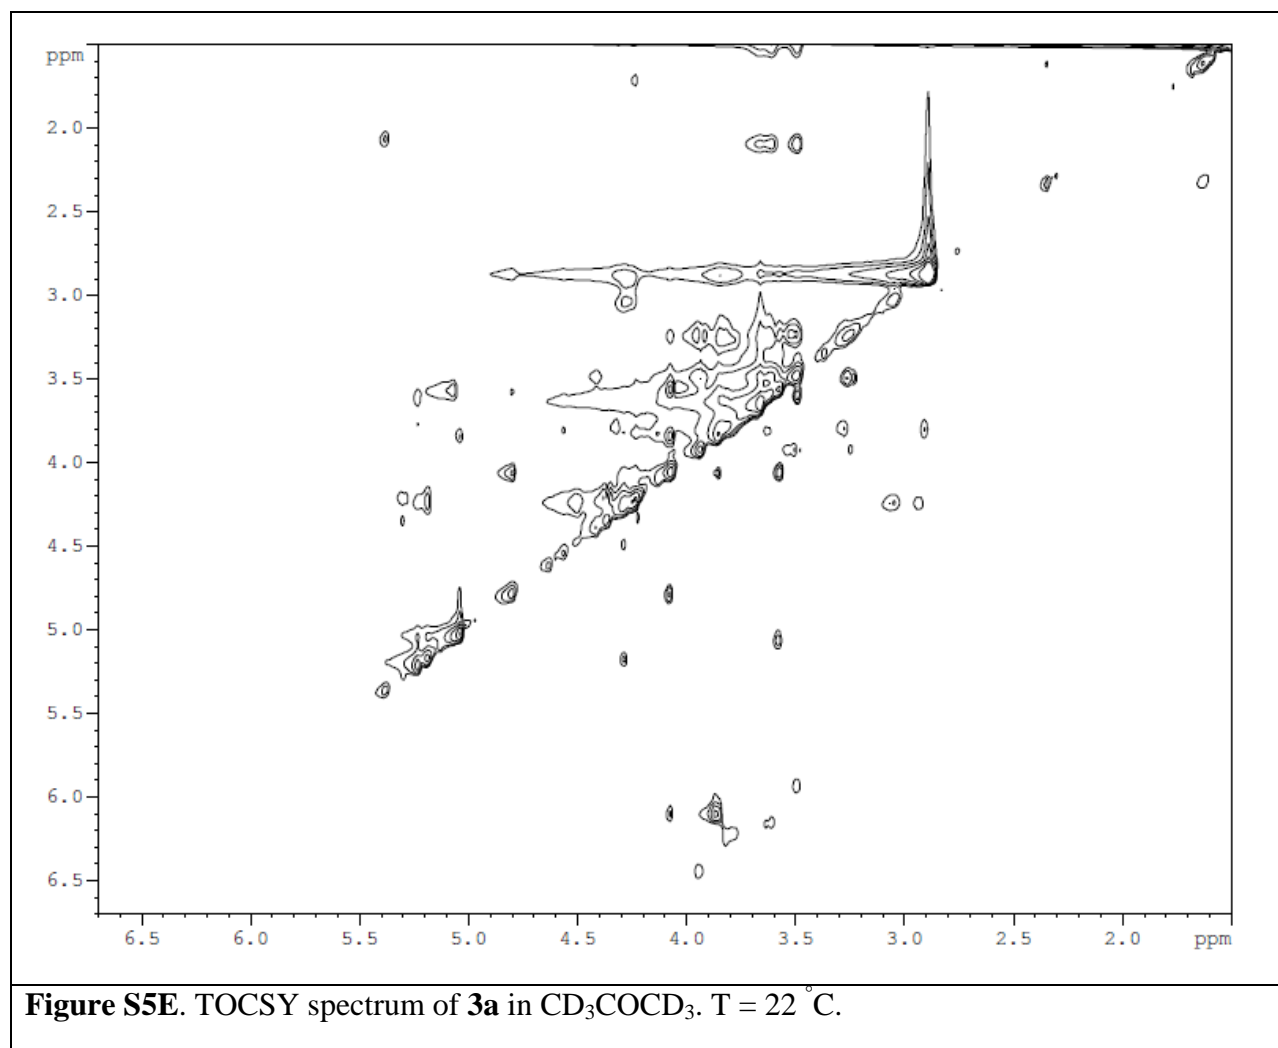

**Figure S5E.** TOCSY spectrum of **3a** in  $\text{CD}_3\text{COCD}_3$ .  $T = 22^\circ\text{C}$ .

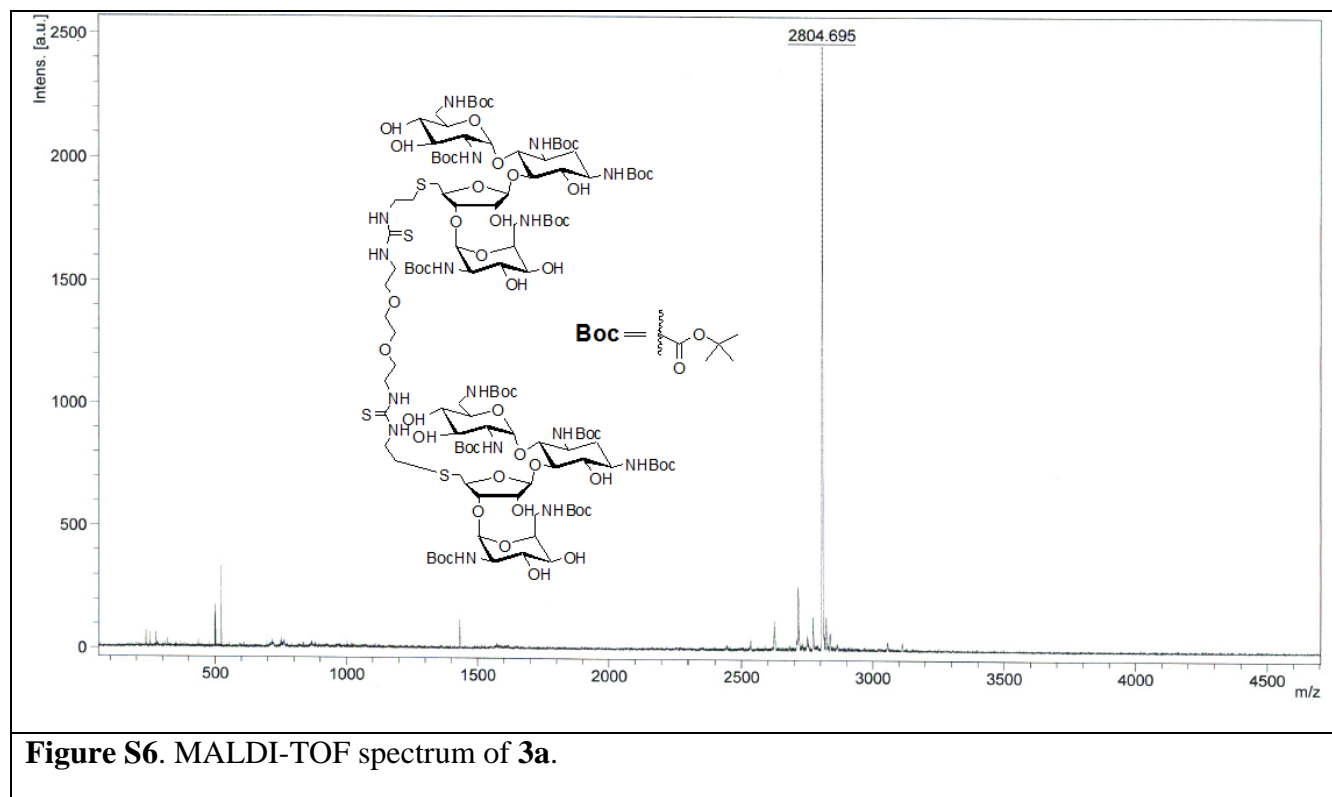

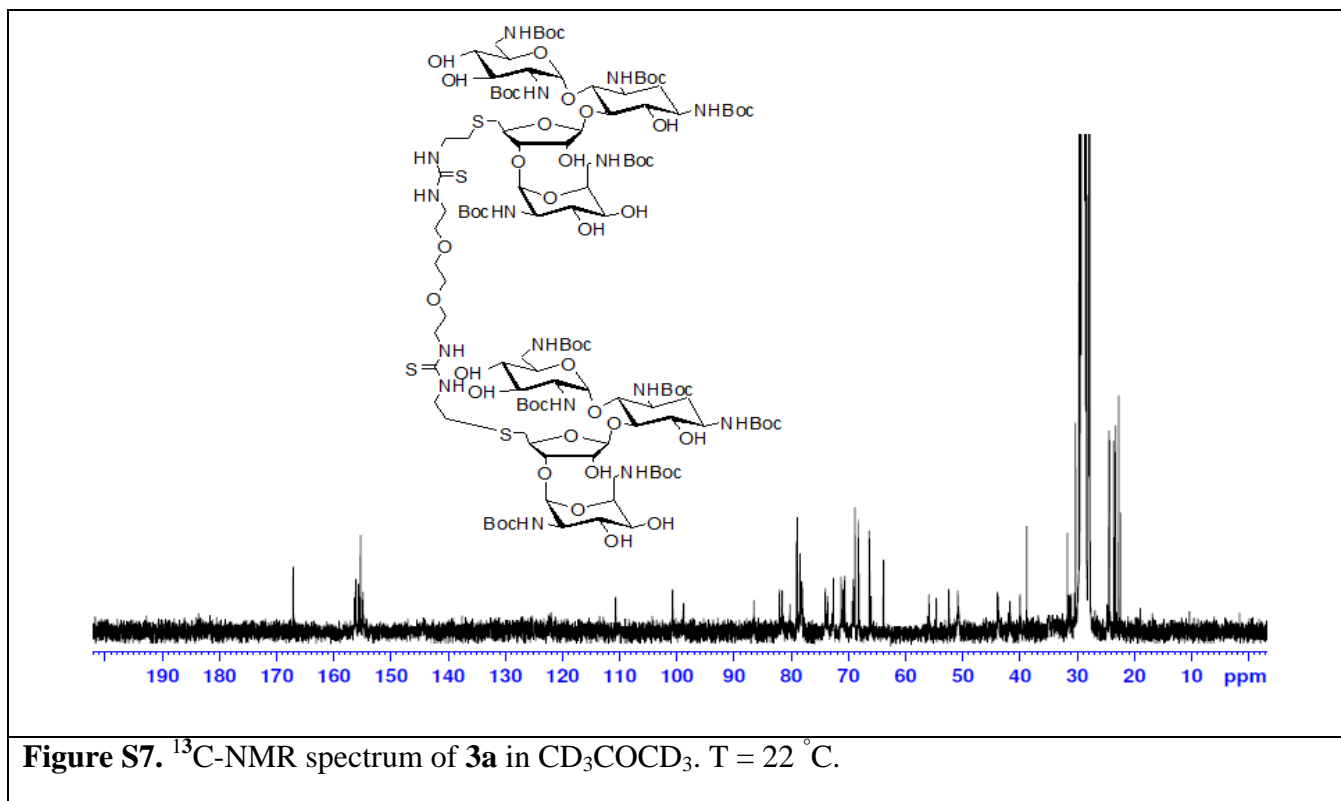

**Figure S7.**  $^{13}\text{C}$ -NMR spectrum of **3a** in  $\text{CD}_3\text{COCD}_3$ .  $T = 22^\circ\text{C}$ .

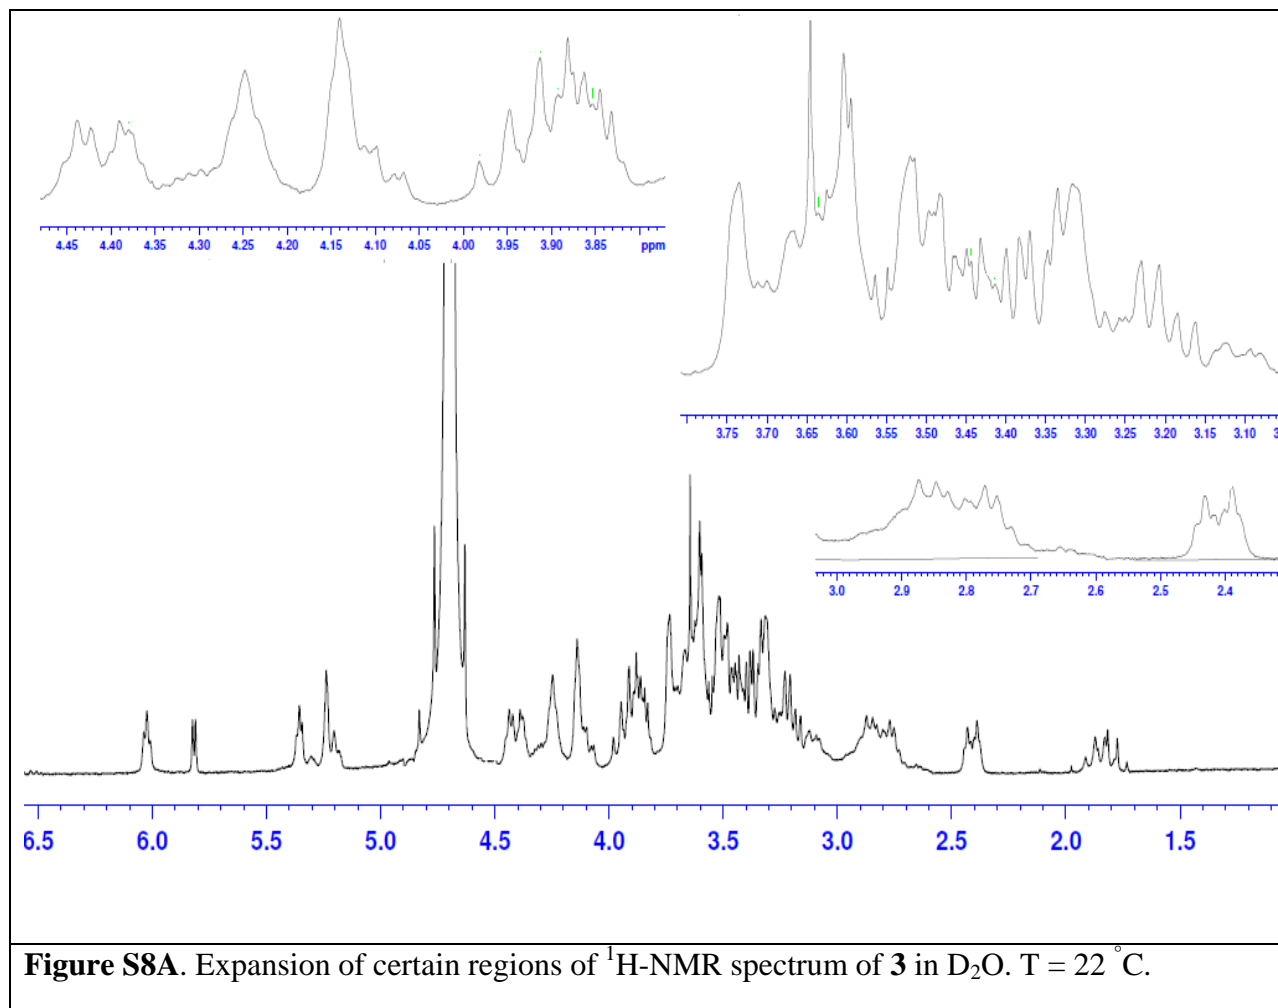

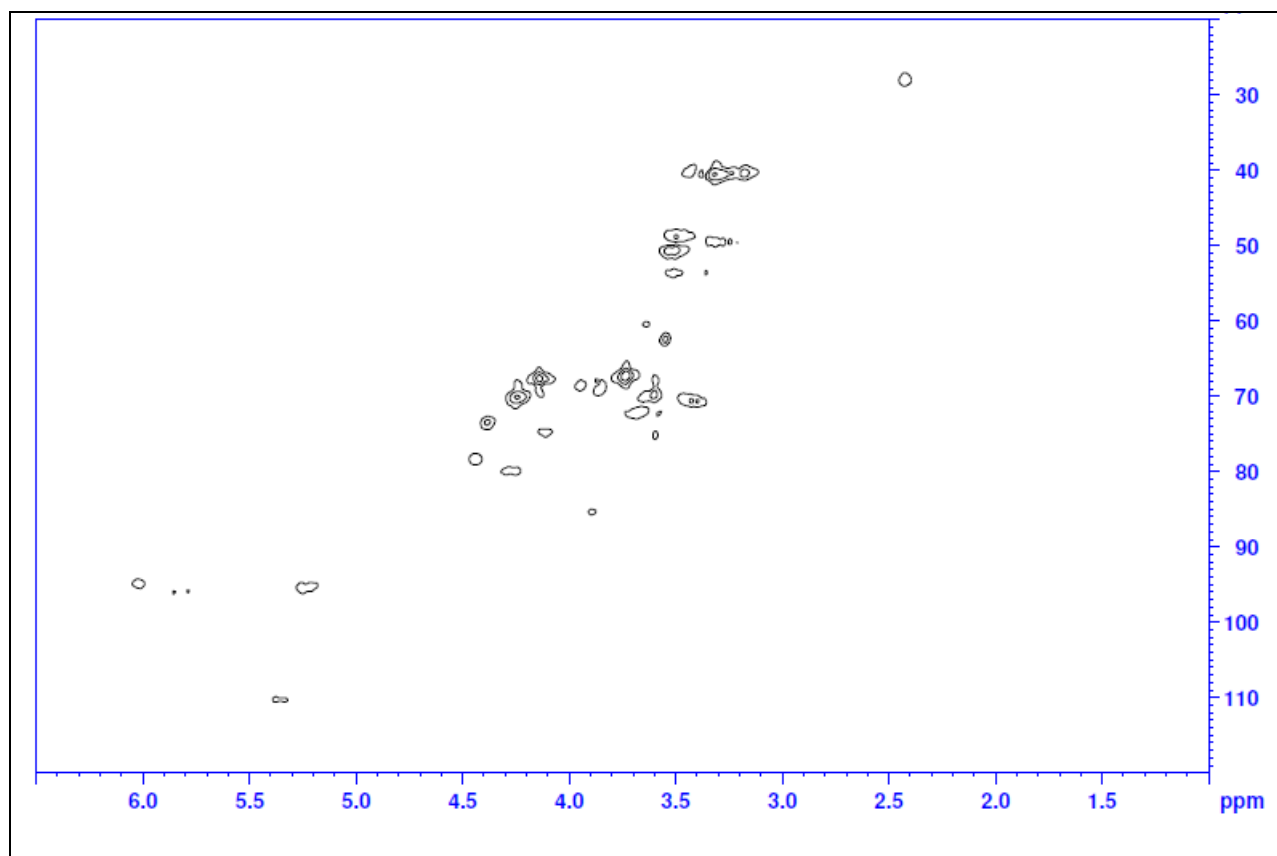

**Figure S8B.** HMQC spectrum of **3** in  $\text{D}_2\text{O}$ . T = 22 °C.

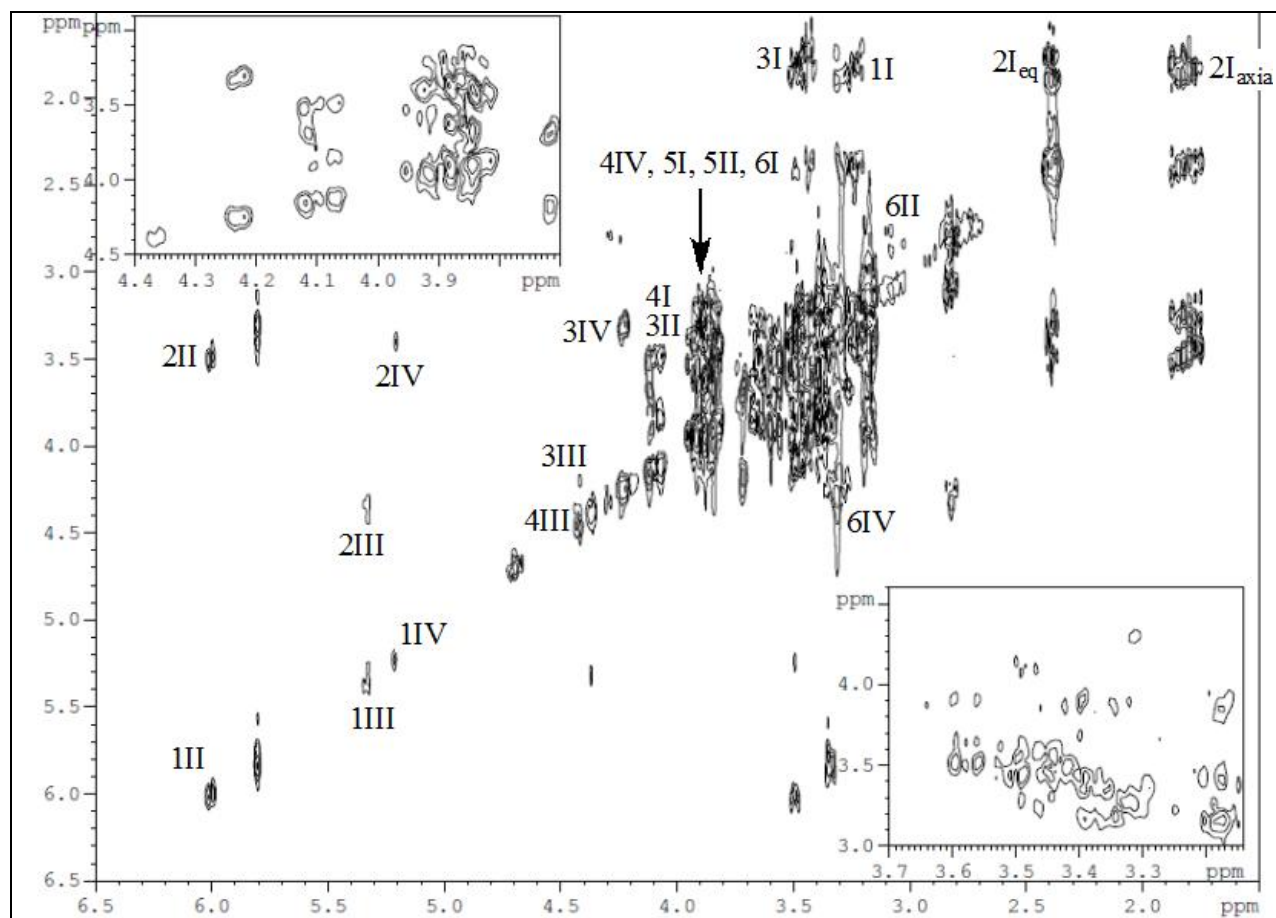

**Figure S8C.** DFQT-COSY spectrum of **3** in D<sub>2</sub>O (The inset shows the heavily crowded region of cross peaks at low intensity). T = 22 °C. Peak Assignments were made with the help of TOCSY, HMQC, and COSY spectra.



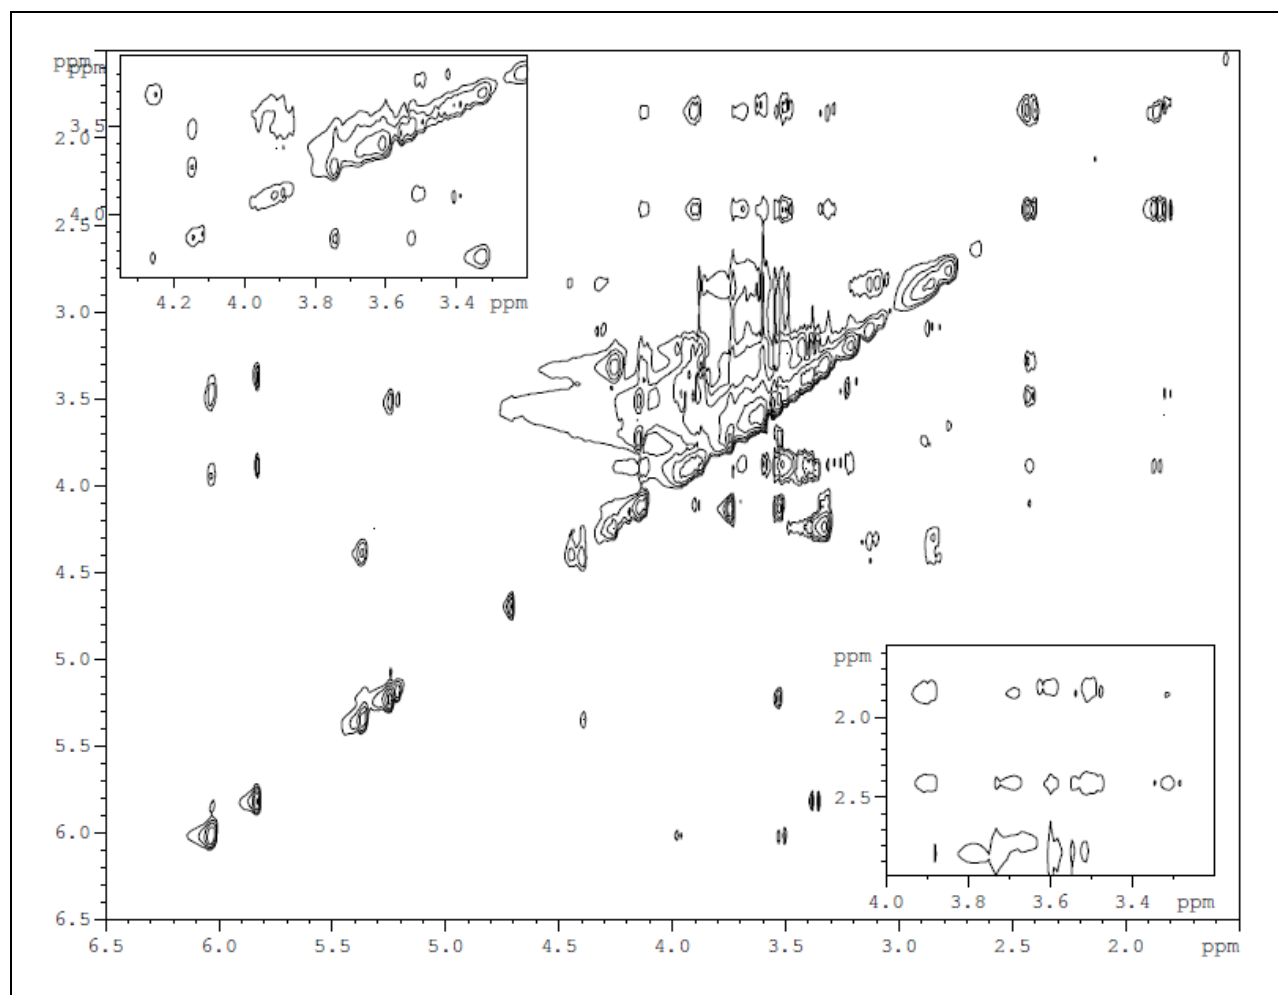

**Figure S8D.** TOCSY spectrum of **3** in D<sub>2</sub>O (The inset shows the heavily crowded region of cross peaks at low intensity). T = 22 °C.

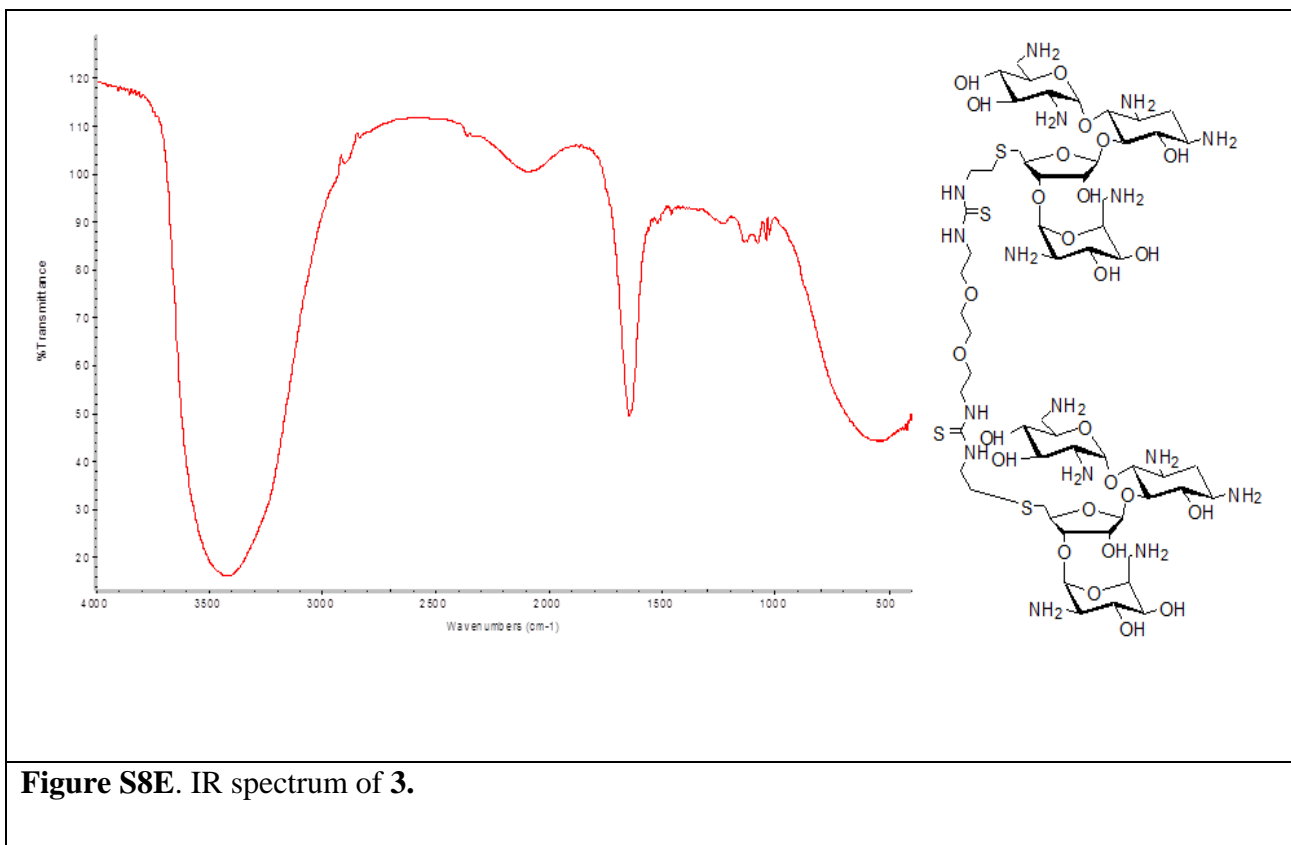

**Figure S8E.** IR spectrum of **3**.

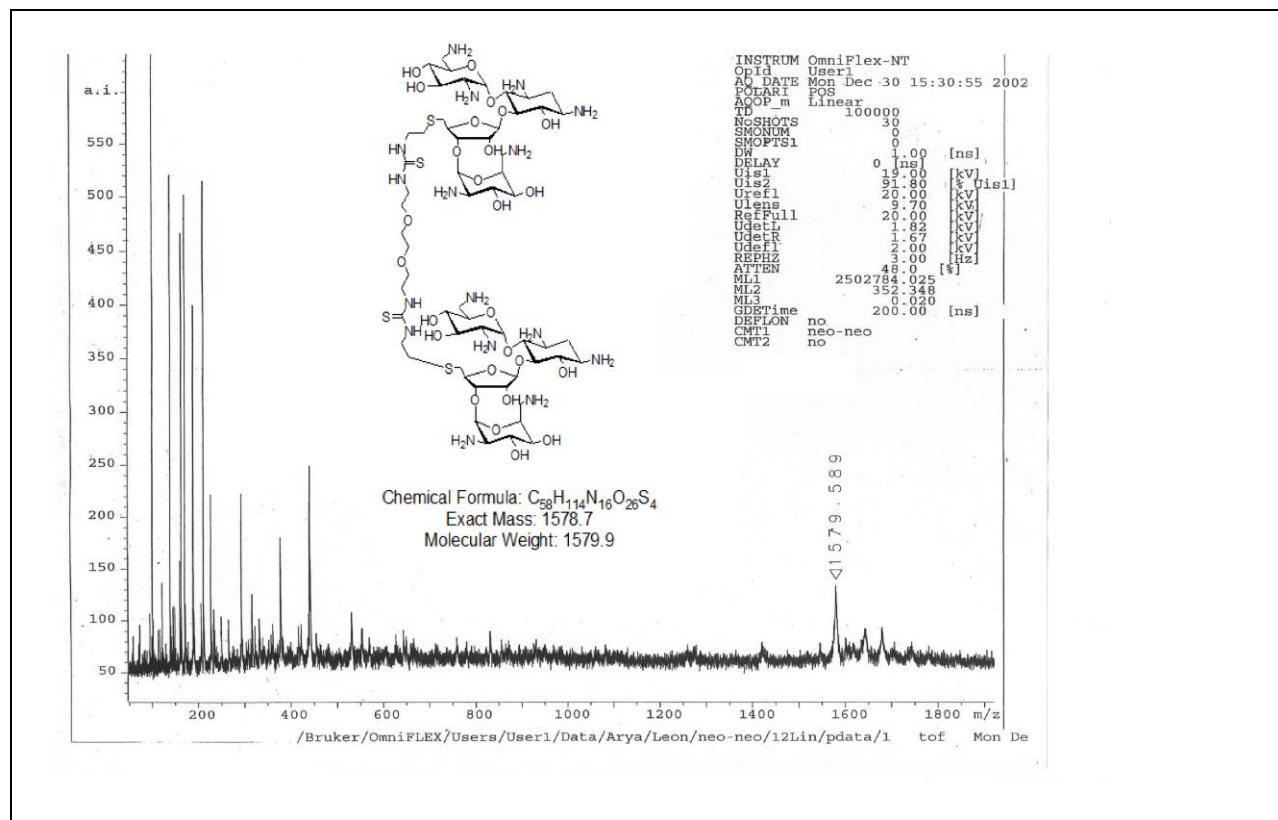

**Figure S9.** MALDI-TOF spectrum of **3**.

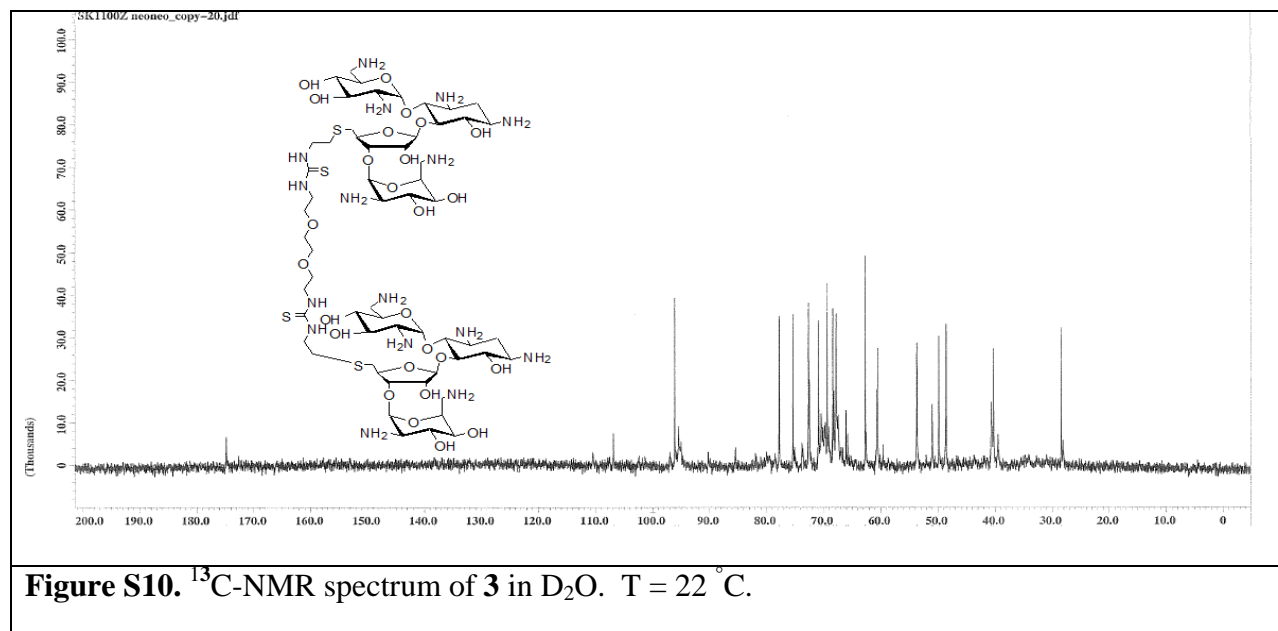

**Figure S10.**  $^{13}C$ -NMR spectrum of **3** in  $D_2O$ . T = 22 °C.

## 2. Biophysical characterization of **3** with Nucleic acids.

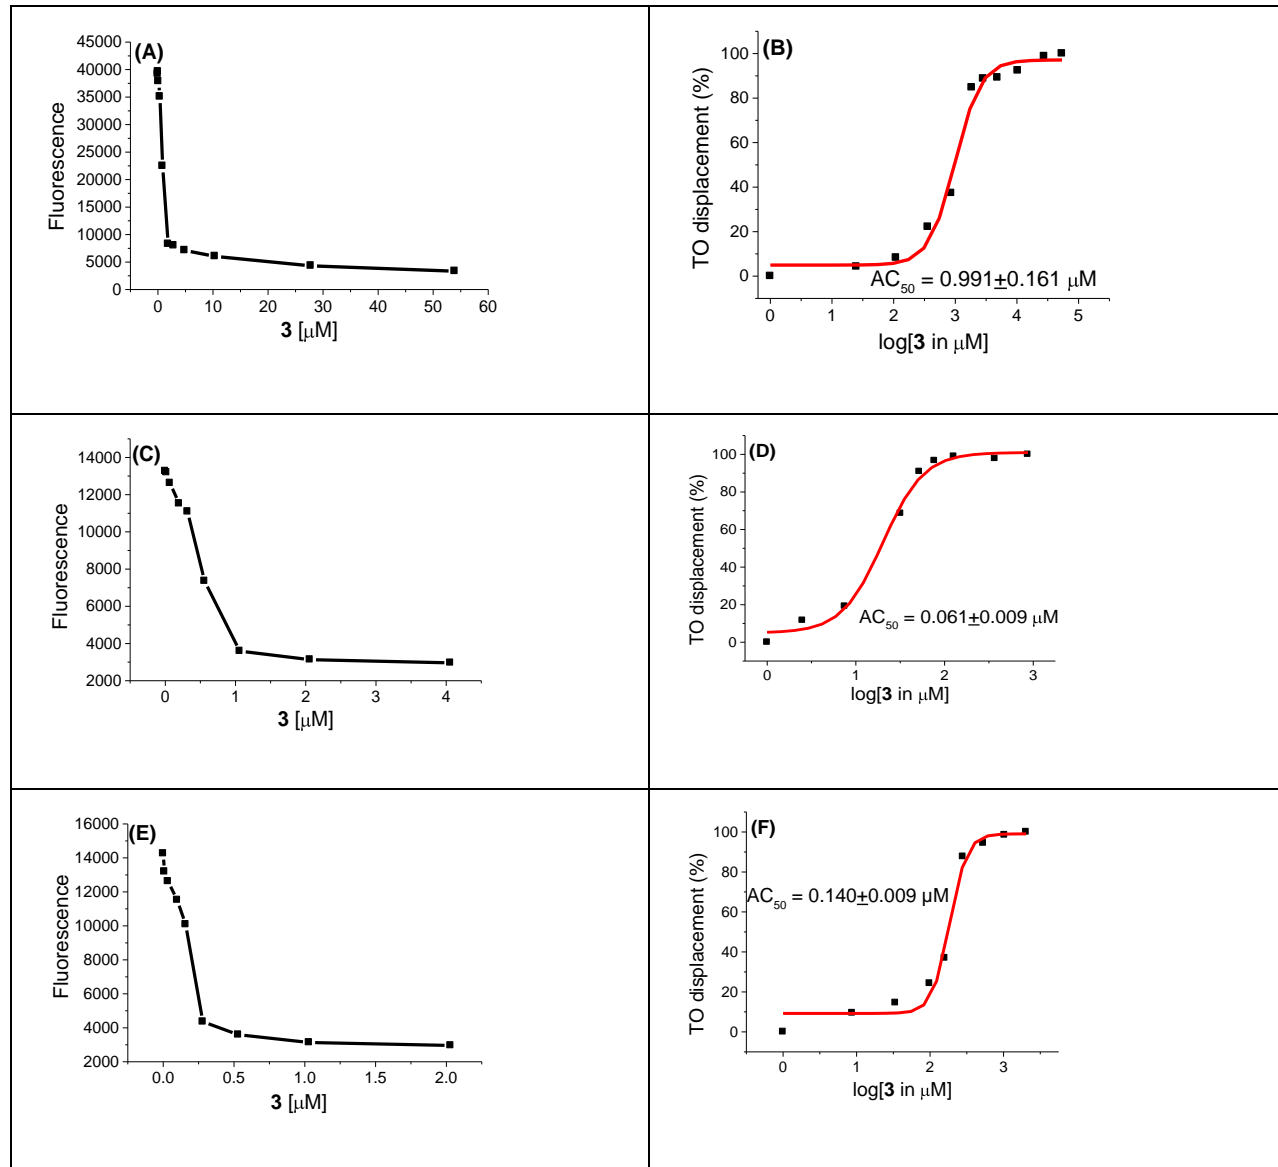

**Figure S11.** A graphical representation of FID assay to calculate the  $AC_{50}$  value of **3** with various polynucleotides. (A) Plot showing decrease in the fluorescence intensity of poly(dA).2poly(dT)-TO complex as a function of increasing concentration of **3**. (B) A sigmoidal fit between percentage of TO displaced from poly(dA).2poly(dT) as a function of  $\log[3]$ . (C) Plot showing decrease in the fluorescence intensity of poly(dA.dT)<sub>2</sub>-TO complex as a function of increasing concentration of **3**. (D) A sigmoidal fit between percentage of TO displaced from poly(dA.dT)<sub>2</sub> as a function of  $\log[3]$ . (E) Plot showing decrease in the fluorescence intensity of poly(dG).poly(dC)-TO complex as a function of increasing

concentration of **3**. (F) A sigmoidal fit between percentage of TO displaced from poly(dG).poly(dC) as a function of  $\log[3]$ . Buffer conditions: 100 mM KCl, 10 mM SC, 0.5 mM EDTA, pH 6.8.  $[\text{polynucleotide}] = 0.88 \mu\text{M}/\text{bp}$ ,  $[\text{TO}] = 1.25 \mu\text{M}$ . The reported  $\text{AC}_{50}$  value in each case is an average of three separate experiments. The  $\text{AC}_{50}$  value for each experiment was calculated with Origin 5.0.

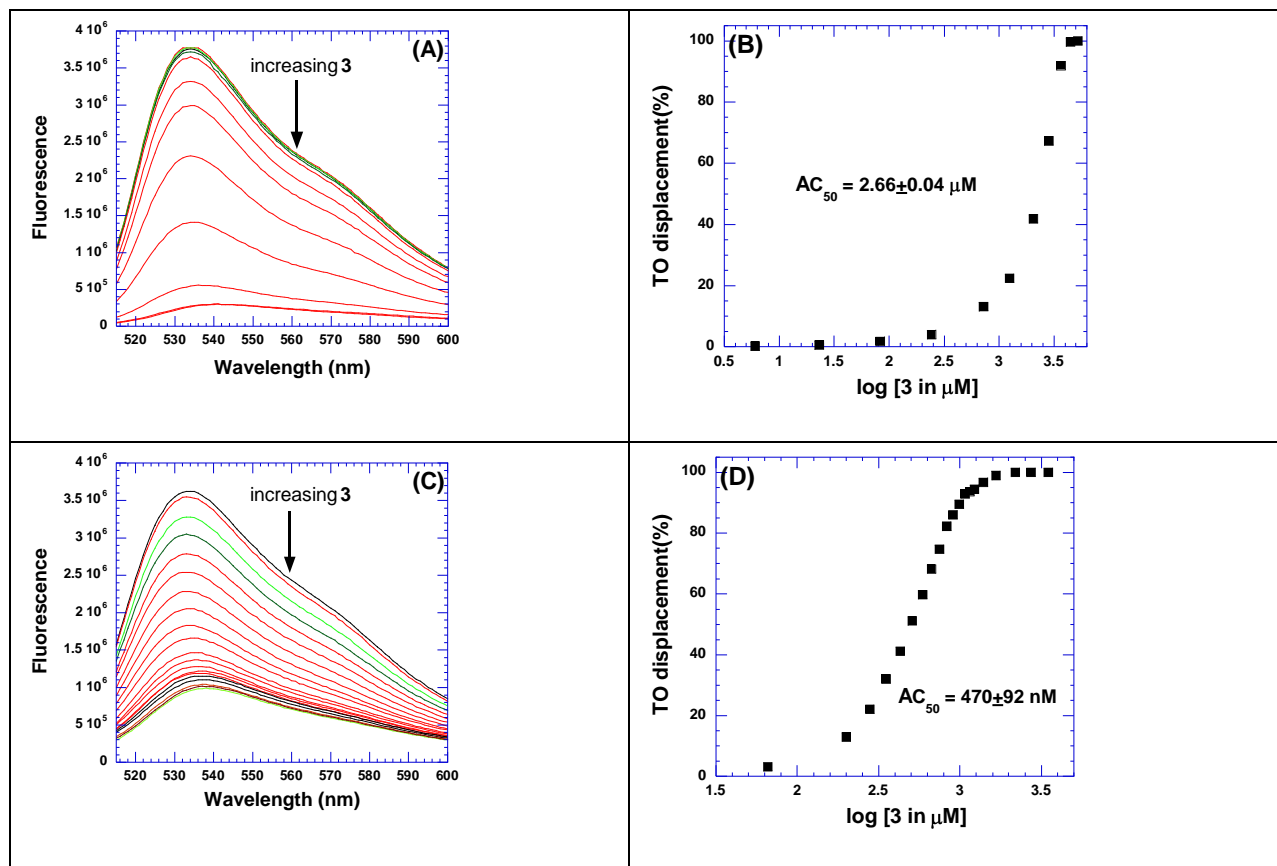

**Figure S12.** FID titration of **3** with intramolecular duplex  $d[5'-A_{12}-x-T_{12}-3']$  and triplex  $d[5'-A_{12}-x-T_{12}-x-T_{12}-3']$ . Raw fluorescence emission spectrum of (A) intramolecular triplex  $d[5'-A_{12}-x-T_{12}-x-T_{12}-3']$  and (C) intramolecular duplex  $d[5'-A_{12}-x-T_{12}-3']$ . A sigmoidal fit between percentage of TO displaced from (B) triplex  $d[5'-A_{12}-x-T_{12}-x-T_{12}-3']$  and (D) intramolecular duplex  $d[5'-A_{12}-x-T_{12}-3']$  as a function of  $\log[3]$ . Buffer conditions: 100 mM KCl, 10 mM SC, 0.5 mM EDTA, pH 6.8.  $d[5'-A_{12}-x-T_{12}-3'] = 1 \mu\text{M}/\text{strand}$ .  $[\text{TO}] = 6 \mu\text{M}$ . The reported  $\text{AC}_{50}$  value in each case is an average of three separate experiments. The  $\text{AC}_{50}$  value for each experiment was calculated with Origin 5.0.

| Compound name | AC <sub>50</sub> values (nM) |
|---------------|------------------------------|
| Neomycin      | (471±28)×10 <sup>2</sup>     |
| <b>3</b>      | 470±92                       |

**Table S1.** AC<sub>50</sub> values of **3** and neomycin with d[5'-A<sub>12</sub>-x-T<sub>12</sub>-3']. The solutions were equilibrated for 5 min. before taking the fluorescence emission scans. Buffer conditions: 100 mM KCl, 10 mM SC, 0.5 mM EDTA, pH 6.8. d[5'-A<sub>12</sub>-x-T<sub>12</sub>-3'] = 1 μM/strand. [TO] = 6 μM. The reported AC<sub>50</sub> value is an average of three separate experiments.

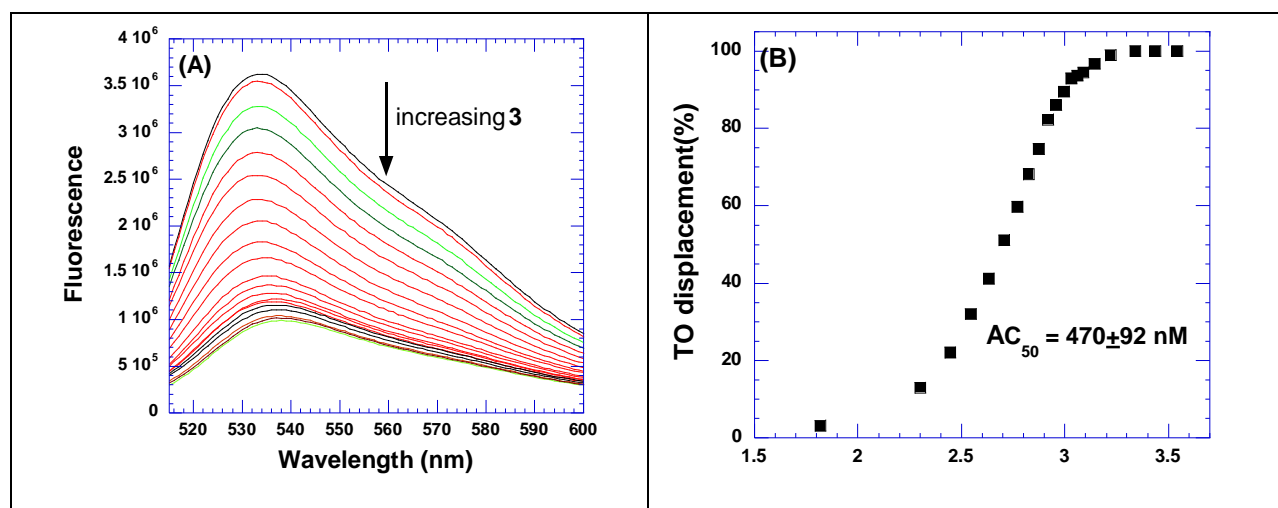

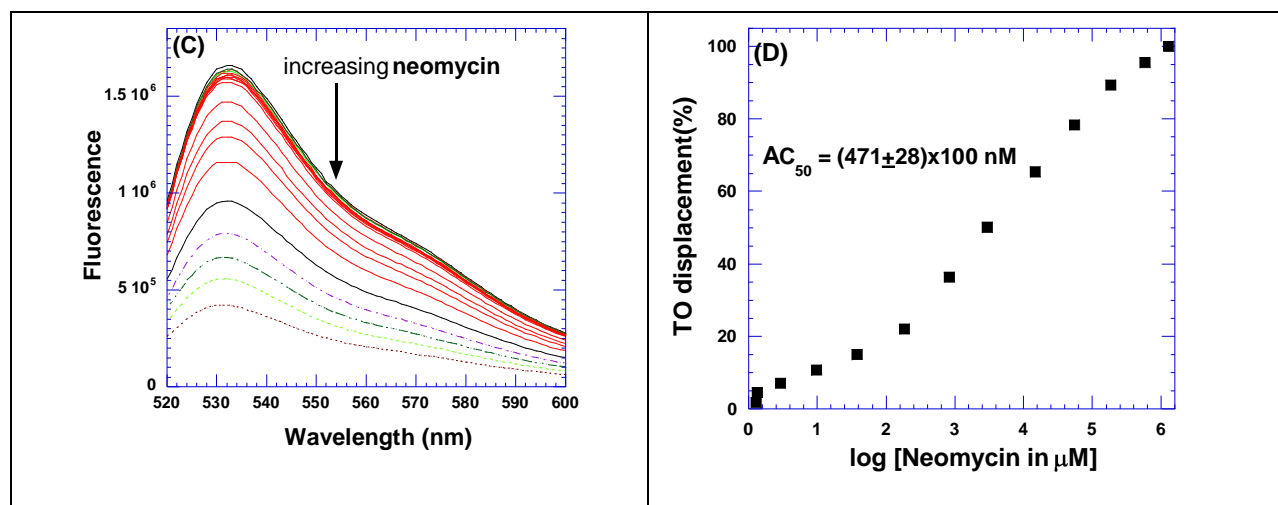

**Figure S13.** FID titration of ligands (**3** and neomycin) with intramolecular duplex d[5'-A<sub>12</sub>-x-T<sub>12</sub>-3']. (A) Raw fluorescence emission spectrum in the presence of increasing concentration of **3**. (B) A sigmoidal fit between percentage of thiazole orange displaced from intramolecular duplex d[5'-A<sub>12</sub>-x-T<sub>12</sub>-3'] as a function of log[**3**]. (C) Raw fluorescence emission spectrum in the presence of increasing concentration of neomycin. (D) A sigmoidal fit between percentage of thiazole orange displaced from intramolecular duplex d[5'-A<sub>12</sub>-x-T<sub>12</sub>-3'] as a function of log[neomycin]. The solutions were equilibrated for 5 min. before taking the fluorescence emission scans. Buffer conditions: 100 mM KCl, 10 mM SC, 0.5 mM EDTA, pH 6.8. d[5'-A<sub>12</sub>-x-T<sub>12</sub>-3'] = 1 μM/strand. [TO] = 6 μM. The reported AC<sub>50</sub> value in each case is an average of three separate experiments. The AC<sub>50</sub> value for each and every experiment was calculated by using Origin 5.0 with sigmoidal fit. The lowest and highest values during fit were constrained as 0% and 100% respectively.

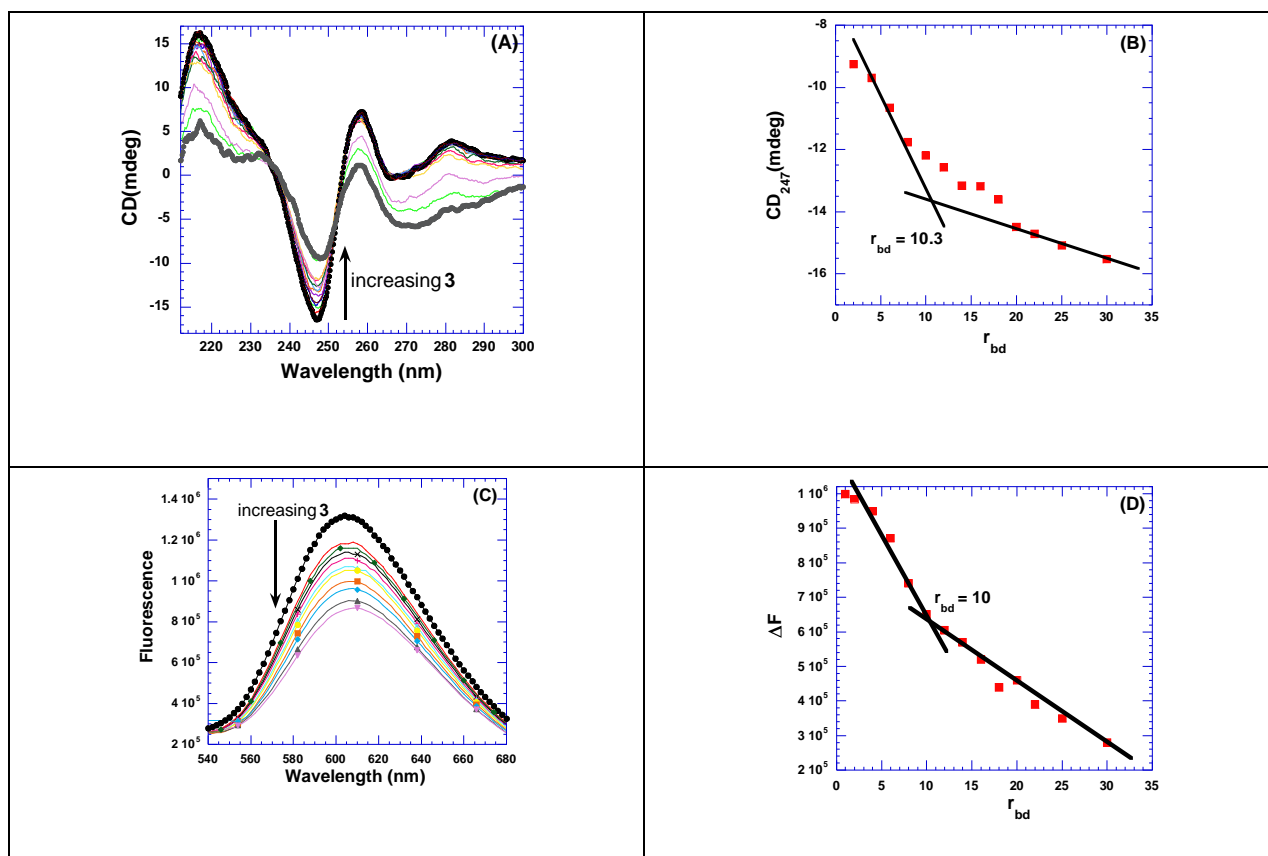

**Figure S14.** (A) CD titration of poly(dA.dT)<sub>2</sub> with increasing concentration of **3**. The continuous changes in the CD spectra correspond to the incremental amount of **3** ranging from a  $r_{bd}$  of 0 to 30. (B) A plot of normalized molar ellipticity versus  $r_{bd}$  for CD titration curve of **3** with poly(dA.dT)<sub>2</sub>. Molar ellipticity is per molar base pairs and  $r_{bd}$  = ratio of the base pair/drug. (C) Raw fluorescence emission spectrum of poly(dA.dT)<sub>2</sub>-EtBr complex with the increasing concentration of **3**. (D) A plot of change in the EtBr fluorescence versus  $r_{bd}$  to obtain the binding site size of **3** with poly(dA.dT)<sub>2</sub>. The CD solution was incubated for 1 h at 20 °C before titrating it with **3**. The FID solutions were equilibrated for 5 min. before taking the fluorescence emission scans. Buffer conditions: 100 mM KCl, 10 mM SC, 0.5 mM EDTA, pH 6.8. [DNA] = 10 μM/bp (for fluorescence titration) and 40 μM/bp (for CD spectroscopy).



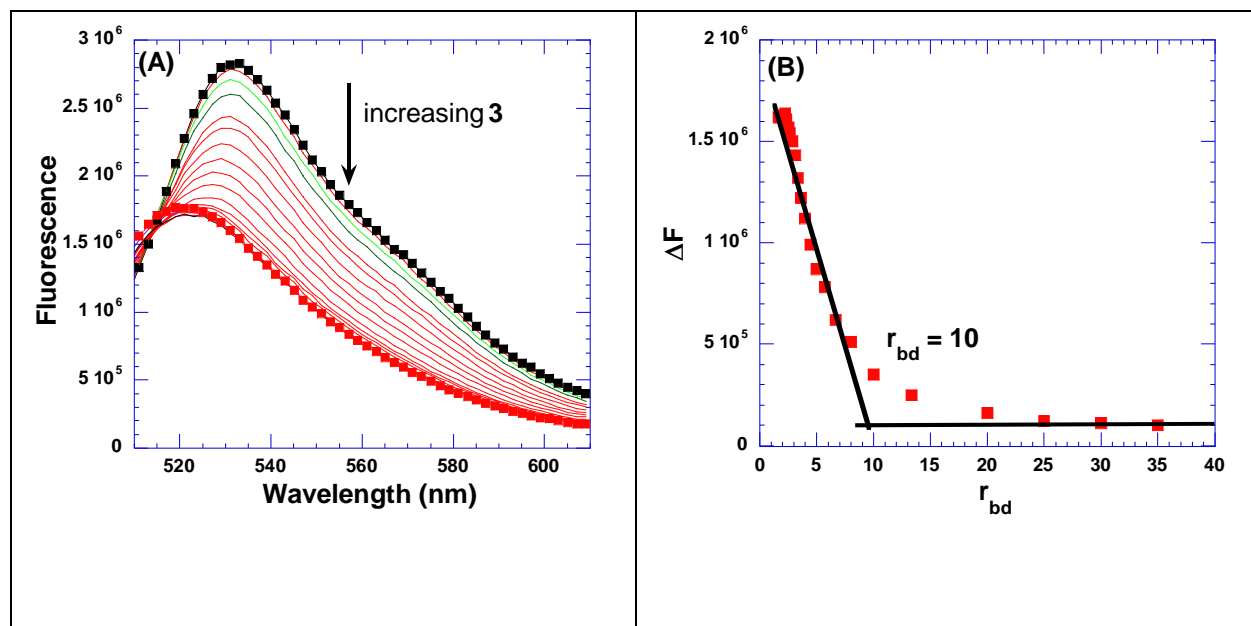

**Figure S15.** TO displacement titration between d[5'-A<sub>30</sub>T<sub>30</sub>-3'] and **3**. (Left) Raw fluorescence emission spectrum of d[5'-A<sub>30</sub>T<sub>30</sub>-3']-TO complex with increasing concentration of **3** showing the decrease of fluorescence intensity (at 532 nm) of d[5'-A<sub>30</sub>T<sub>30</sub>-3']-TO complex. (Right) A plot of change in TO fluorescence and  $r_{bd}$  to determine the binding site size of **3** with d[5'-A<sub>30</sub>T<sub>30</sub>-3']. The solution was incubated for 1 h at 20 °C before titrating it with **3**. The solutions were equilibrated for 5 min. before taking the fluorescence emission scans. Buffer conditions: 100 mM KCl, 10 mM SC, 0.5 mM EDTA, pH 6.8. T = 20 °C. d[5'-A<sub>30</sub>T<sub>30</sub>-3'] = 0.5 μM/duplex, [TO] = 15 μM.

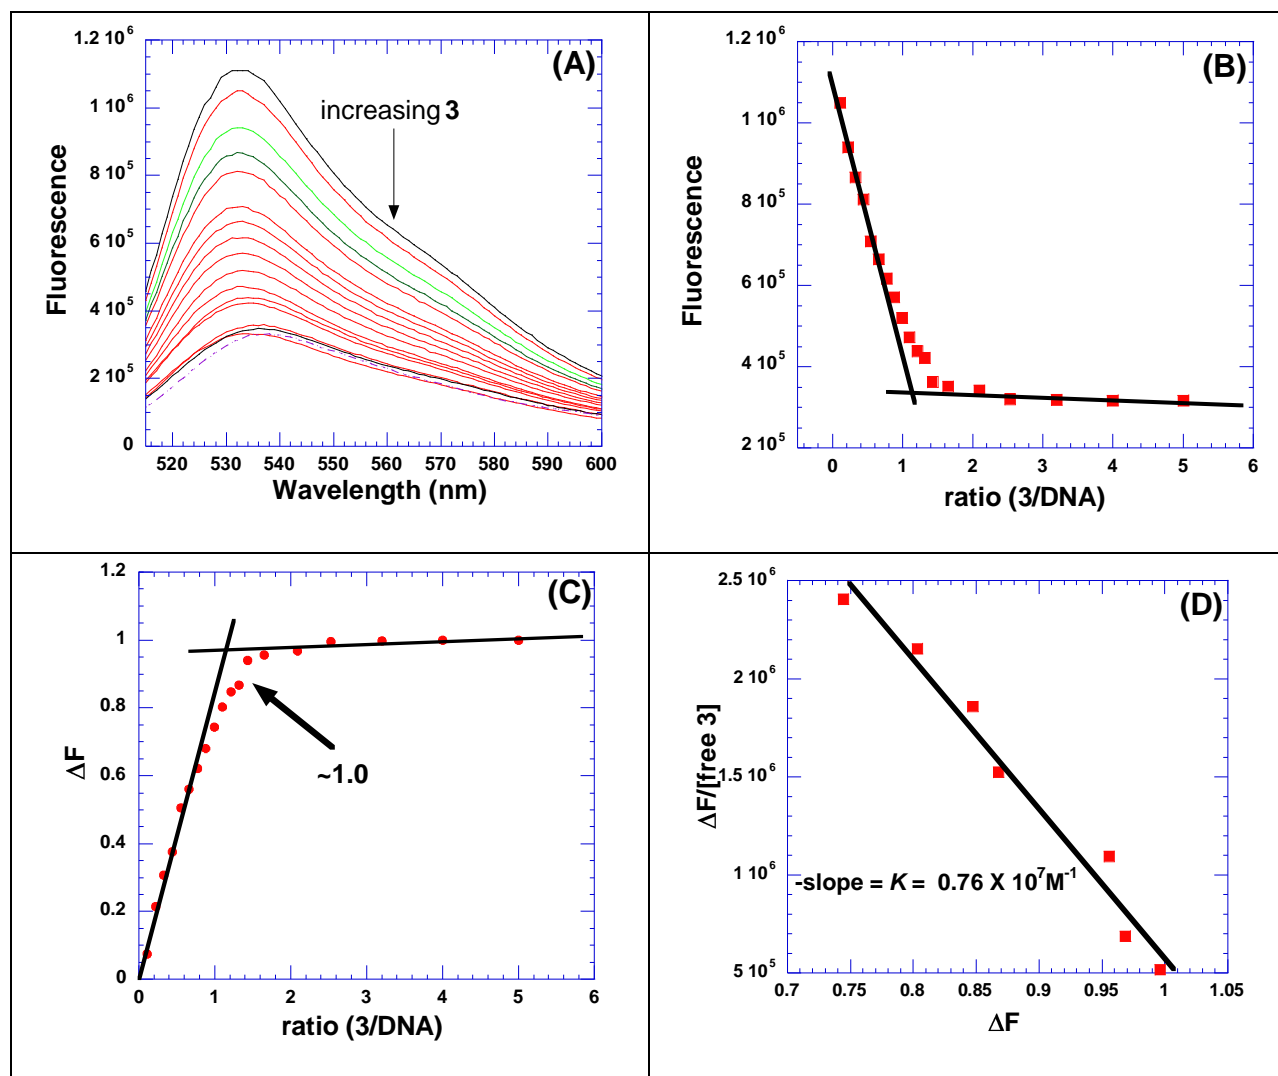

**Figure S16.** FID titration of **3** with intramolecular hairpin duplex d[5'-A<sub>12</sub>-x-T<sub>12</sub>-3']. (A) Raw fluorescence emission spectrum in the presence of increasing concentration of **3**. (B) The decrease of fluorescence intensity (at 532 nm) of DNA-TO complex with increasing concentration of **3**. (C) A plot of fraction of TO displaced versus increase in the concentration of **3**. (D) Scatchard analysis of **3** with duplex d[5'-A<sub>12</sub>-x-T<sub>12</sub>-3']. The solution was incubated for 1 h at 15 °C before titrating it with **3**. The solution was equilibrated for 5 min. before taking the fluorescence emission scans. Buffer conditions: 150 mM KCl, 10 mM SC, 0.5 mM EDTA, pH 6.8. d[5'-A<sub>12</sub>-x-T<sub>12</sub>-3'] = 1 μM/strand, [TO] = 6 μM.

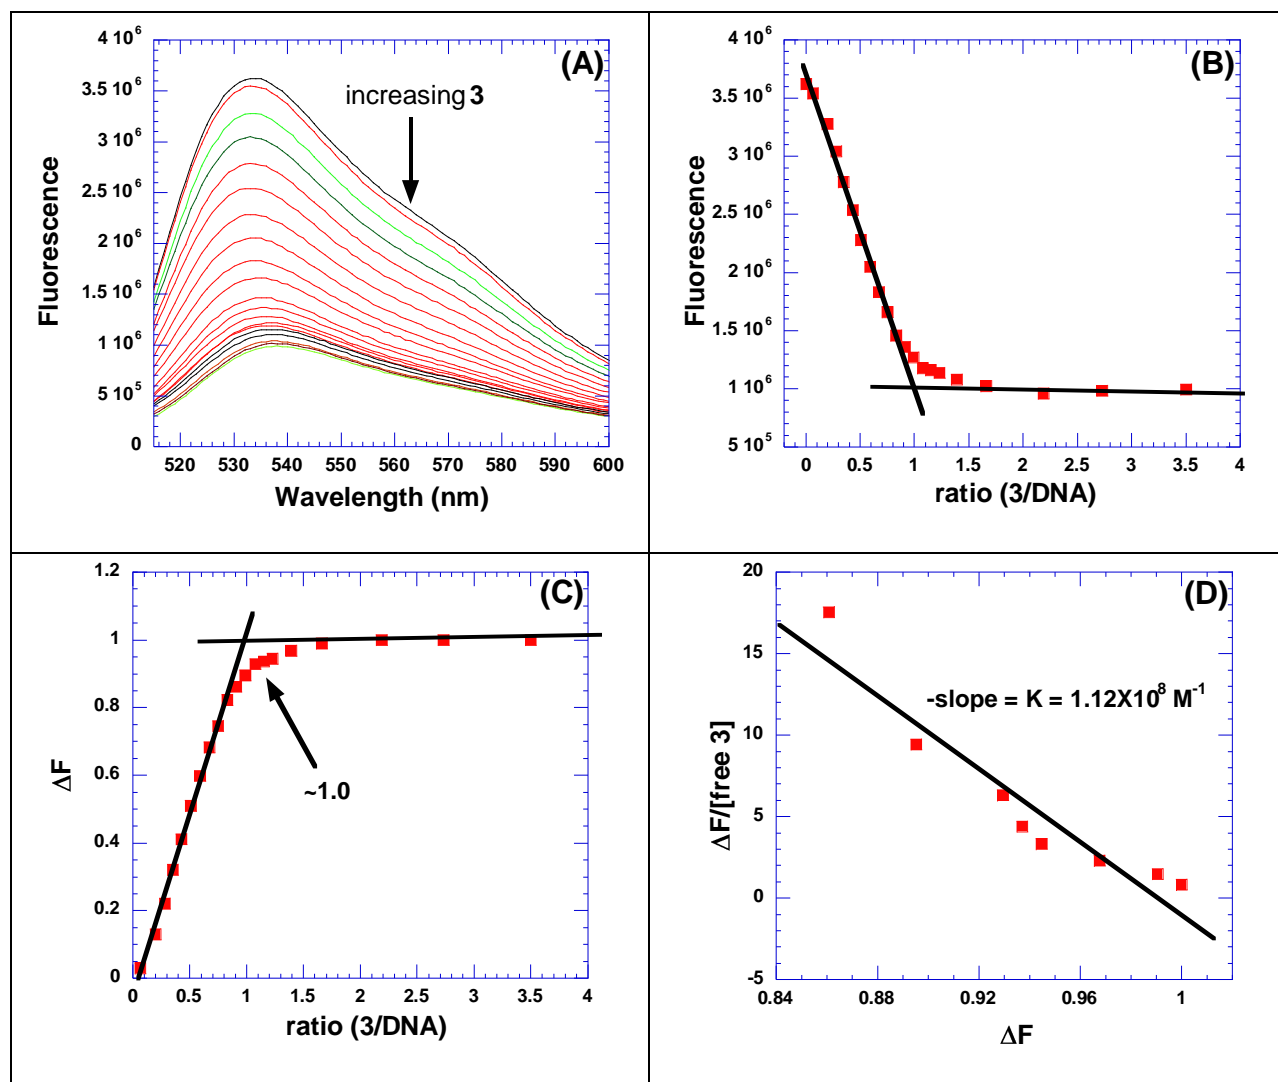

**Figure S17.** FID titration of **3** with intramolecular hairpin duplex d[5'-A<sub>12</sub>-x-T<sub>12</sub>-3']. (A) Raw fluorescence emission spectrum in the presence of increasing concentration of **3**. (B) The decrease of fluorescence intensity (at 532 nm) of DNA-TO complex with increasing concentration of **3**. (C) A plot of fraction of TO displaced versus increase in the concentration of **3**. (D) Scatchard analysis of **3** with duplex d[5'-A<sub>12</sub>-x-T<sub>12</sub>-3']. The solution was incubated for 1 h at 15 °C before titrating it with **3**. The solutions were equilibrated for 5 min. before taking the fluorescence emission scans. Buffer conditions: 100 mM KCl, 10 mM SC, 0.5 mM EDTA, pH 6.8. d[5'-A<sub>12</sub>-x-T<sub>12</sub>-3'] = 1 μM/strand, [TO] = 6 μM.

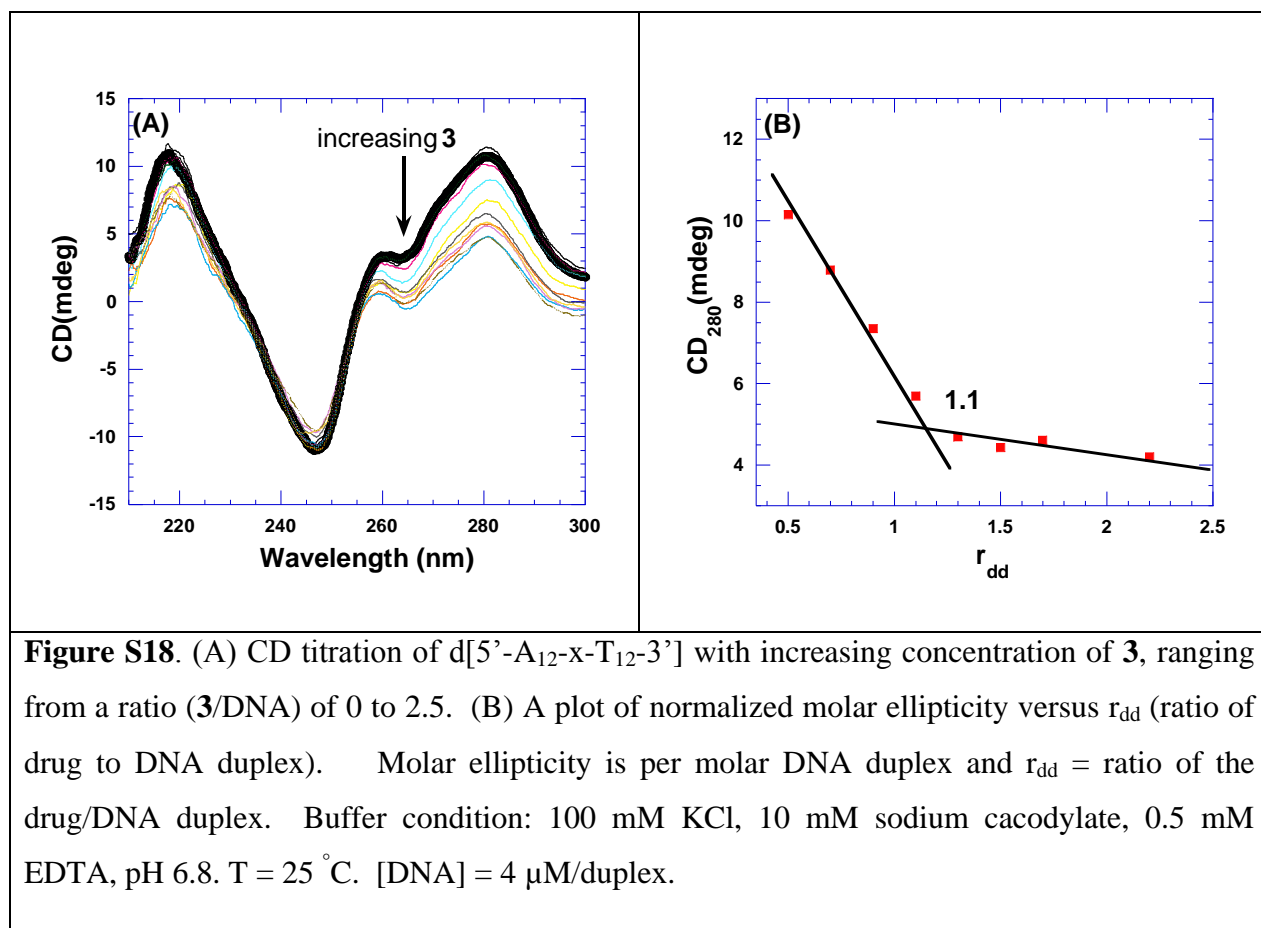

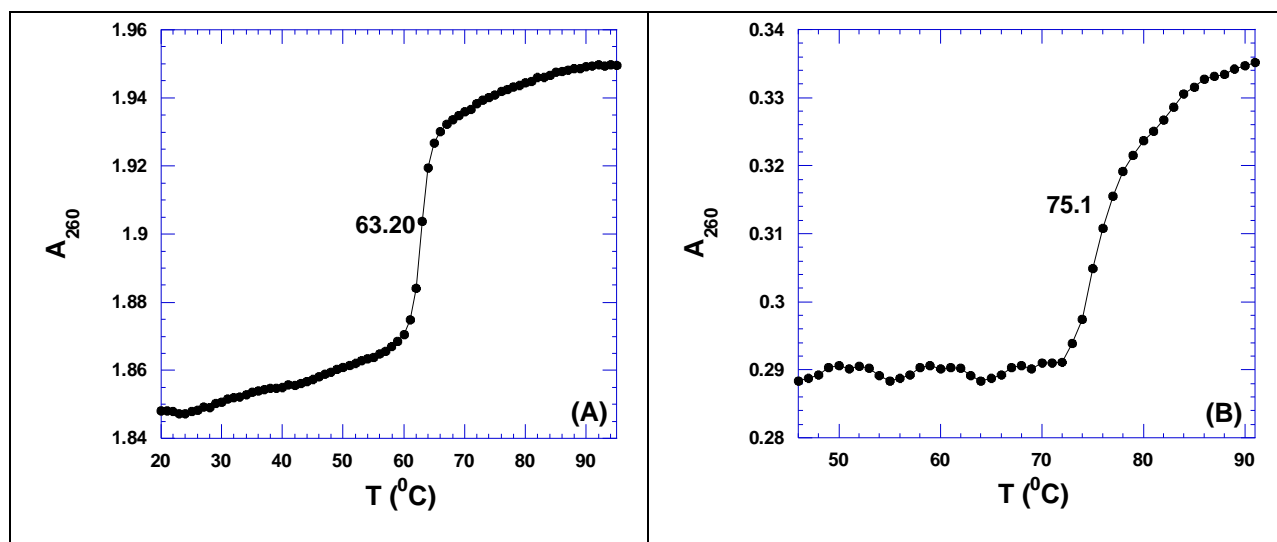

**Figure S19.** UV thermal denaturation profile of poly(dA.dT)<sub>2</sub> in the absence (A) and presence (B) of **3** (1.5 μM,  $r_{bd} = 10$ ). Buffer conditions: 100 mM KCl, 10 mM SC, 0.5 mM EDTA, pH 6.8. [DNA] = 15 μM/bp.

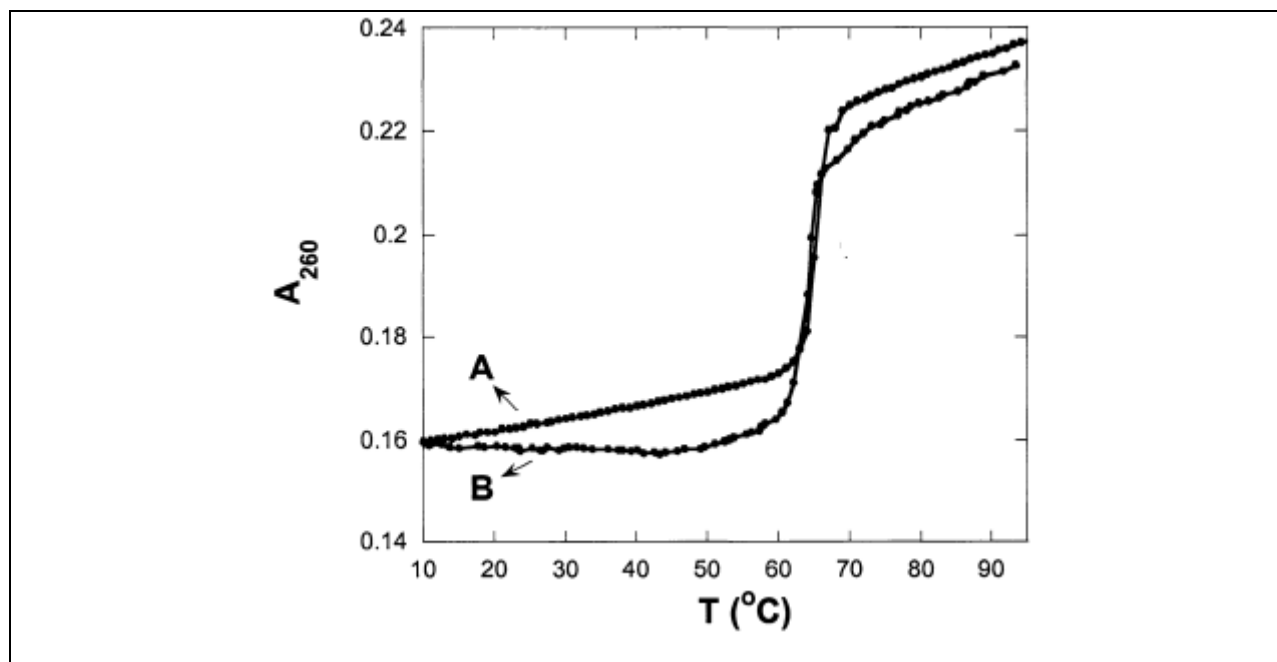

**Figure S20.** UV thermal denaturation profile of poly(dA.dT)<sub>2</sub> in the absence (A) and presence (B) of neomycin (1.5 μM,  $r_{bd} = 10$ ). Buffer conditions: 100 mM KCl, 10 mM SC, 0.5 mM EDTA, pH 6.8. [DNA] = 15 μM / bp.

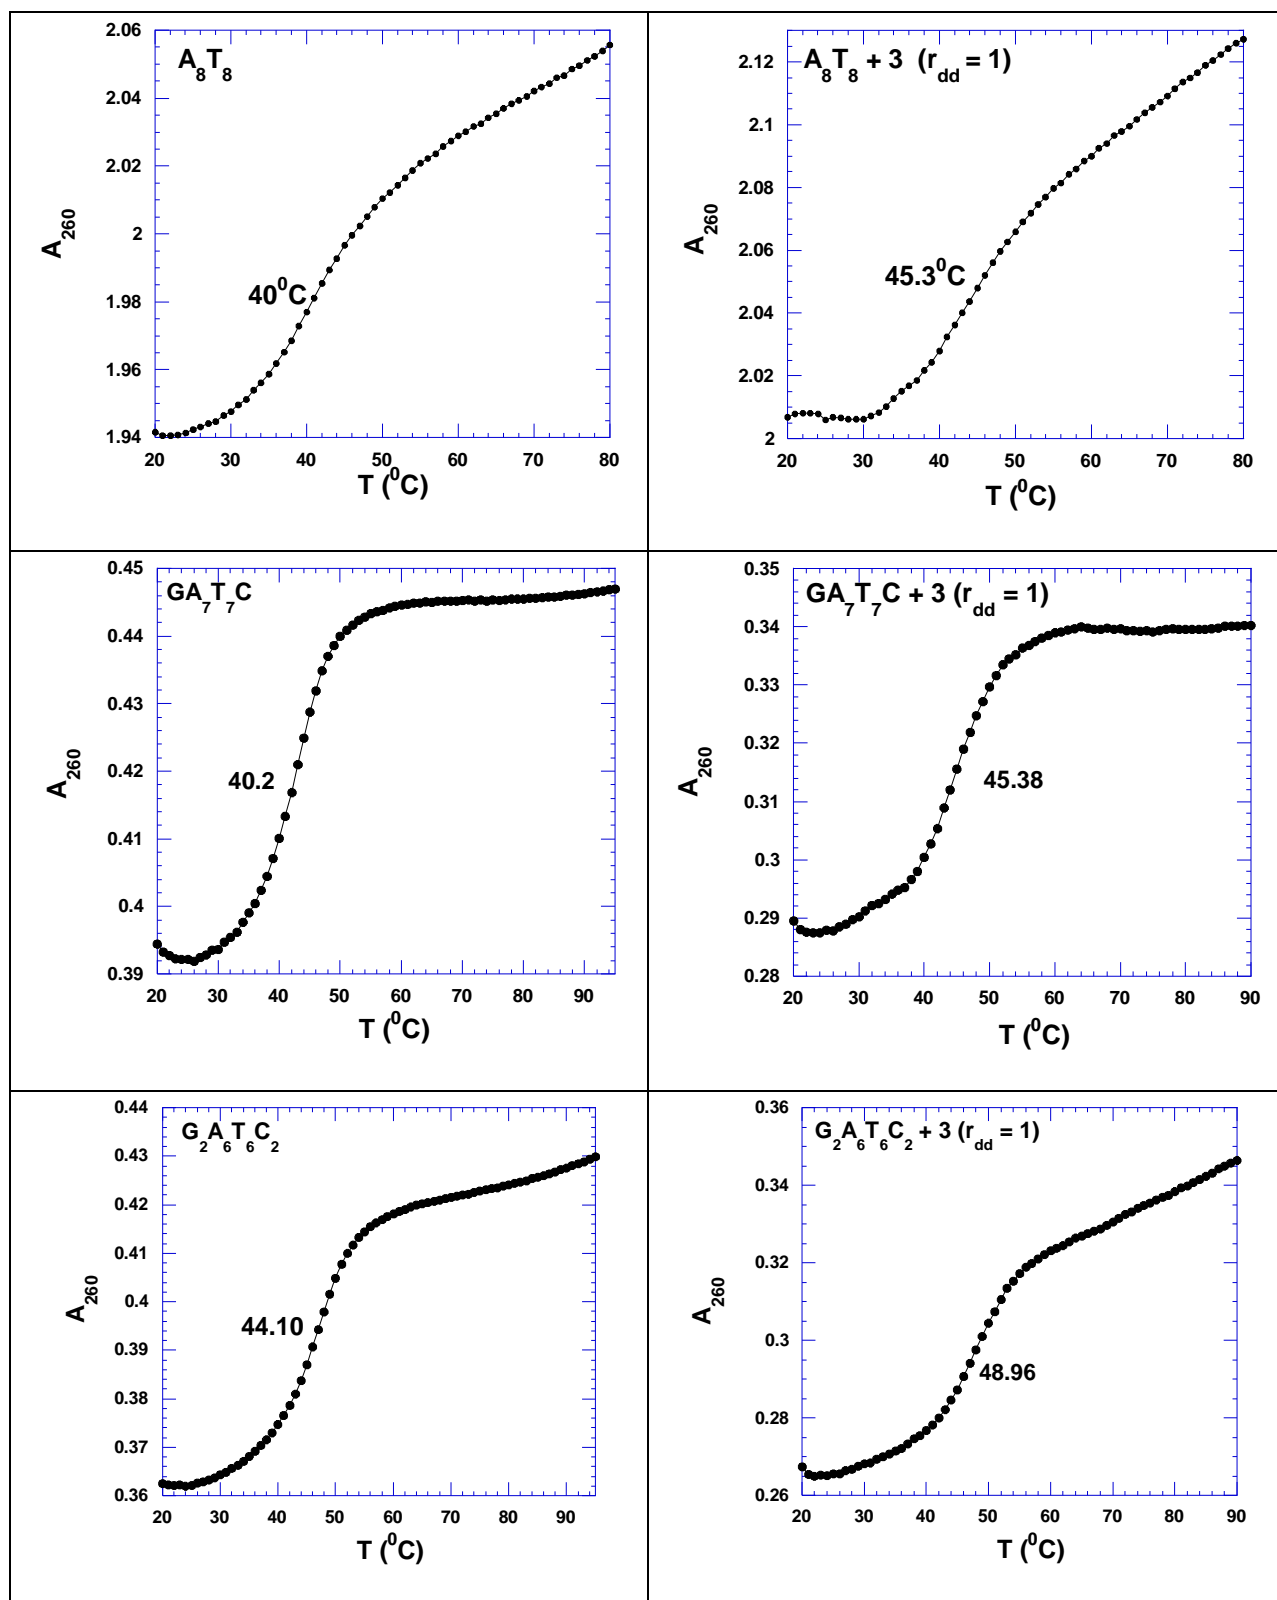

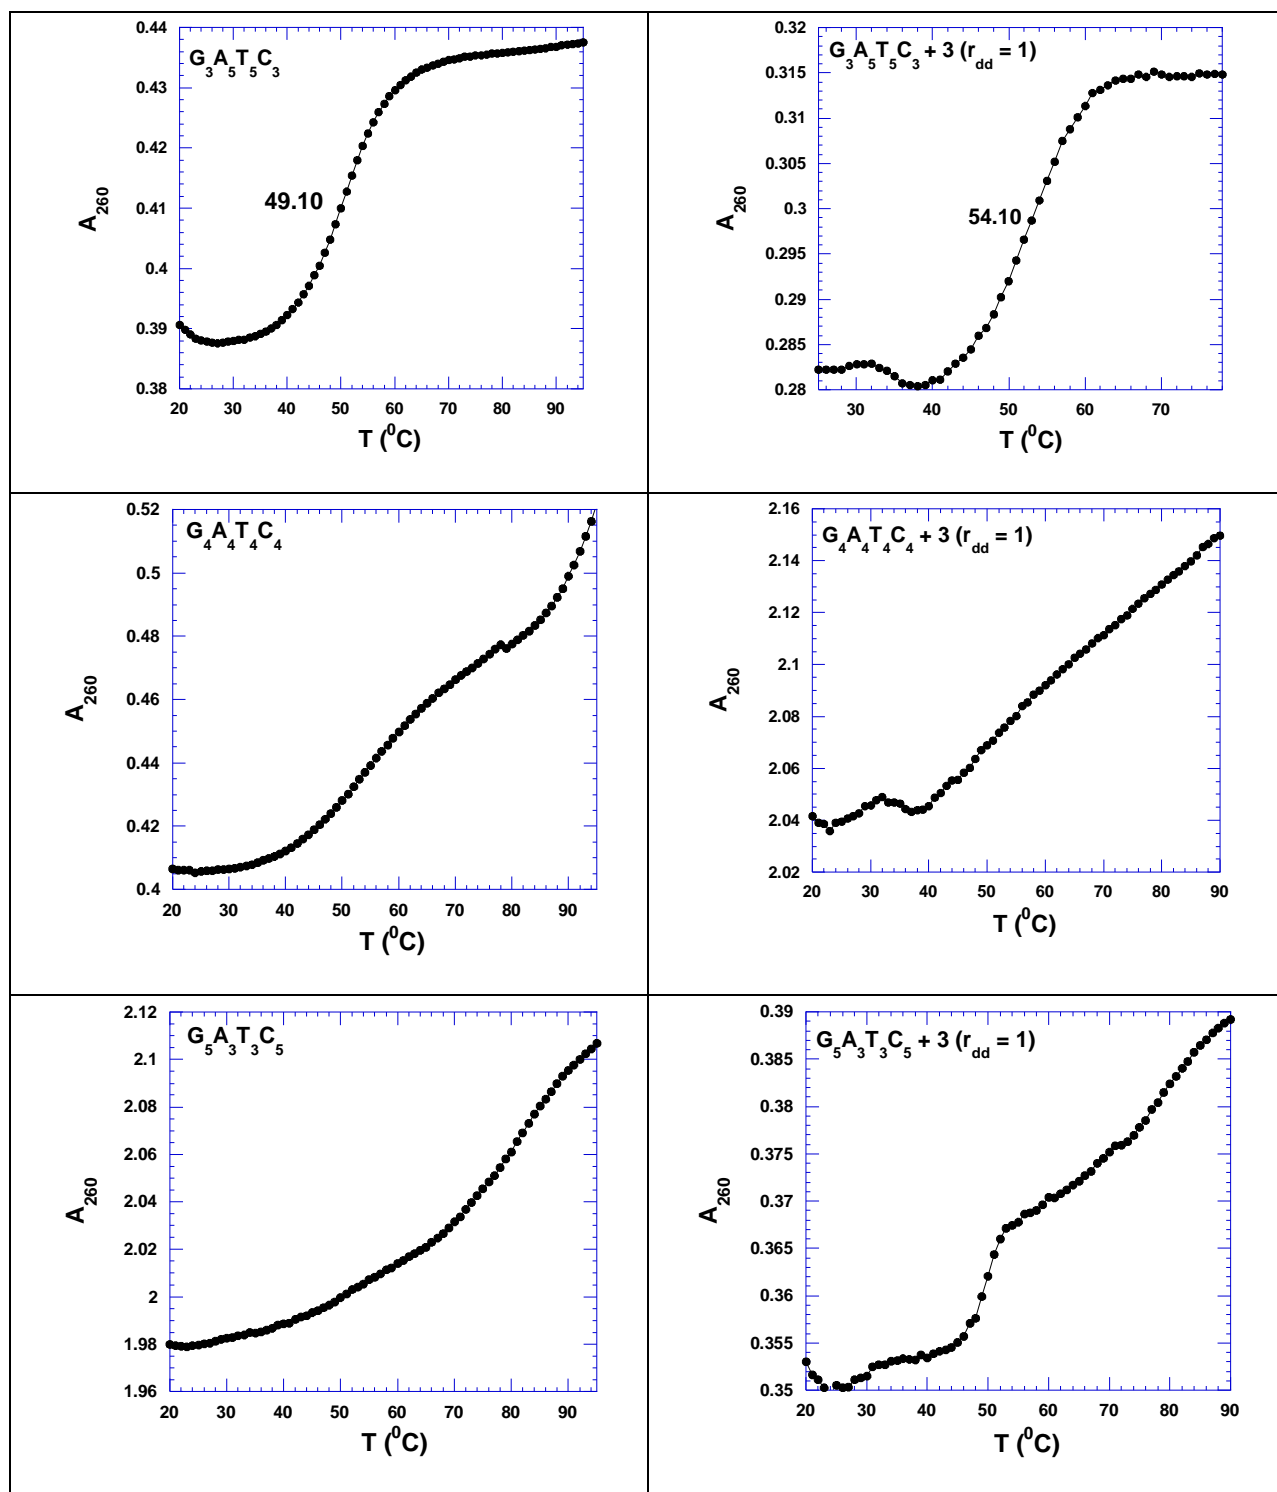

**Figure S21.** UV thermal denaturation profiles of different deoxyoligonucleotides in the absence (left) and presence (right) of **3** at r<sub>dd</sub> = 1 (r<sub>dd</sub> = ratio of drug to DNA duplex) at 260 nm. Buffer conditions: 100 mM KCl, 10 mM SC, 0.5 mM EDTA, pH 6.8. [DNA] = 1 μM/duplex.

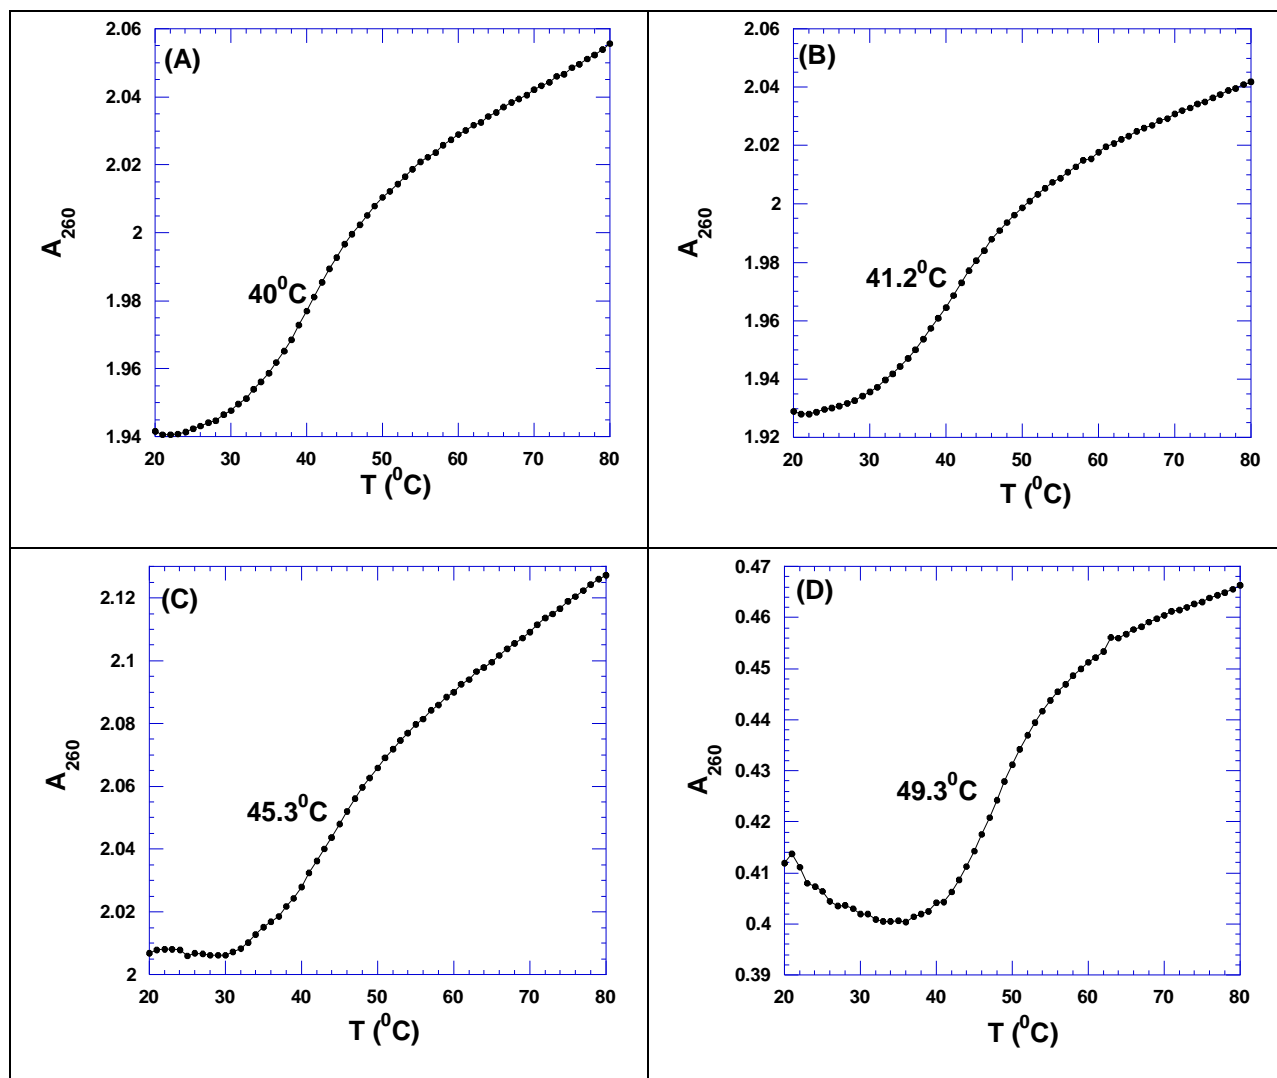

**Figure S22.** UV thermal denaturation profiles of d[5'-A<sub>8</sub>T<sub>8</sub>-3'] in the absence (A) and presence of **3** at  $r_{dd}$  ratio ( $r_{dd}$  = ratio of drug to DNA duplex) of (A) 0.0, (B) 0.5 (0.5  $\mu$ M), (C) 1.0 (1.0  $\mu$ M), and (D) 2 (2.0  $\mu$ M). Buffer conditions: 100 mM KCl, 10 mM SC, 0.5 mM EDTA, pH 6.8.



(A)

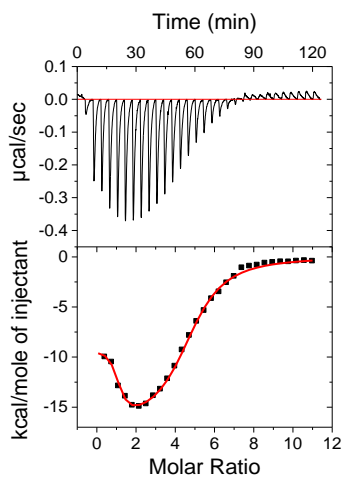

(B)

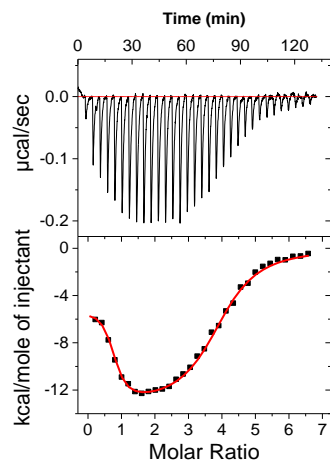

(C)

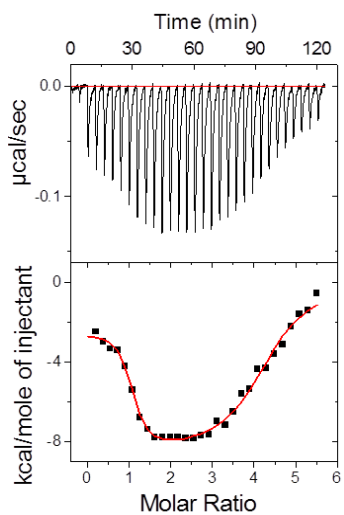

(D)

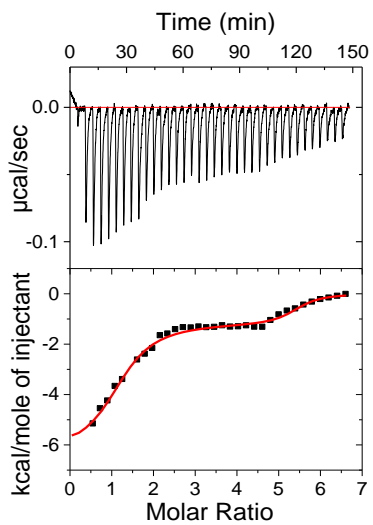

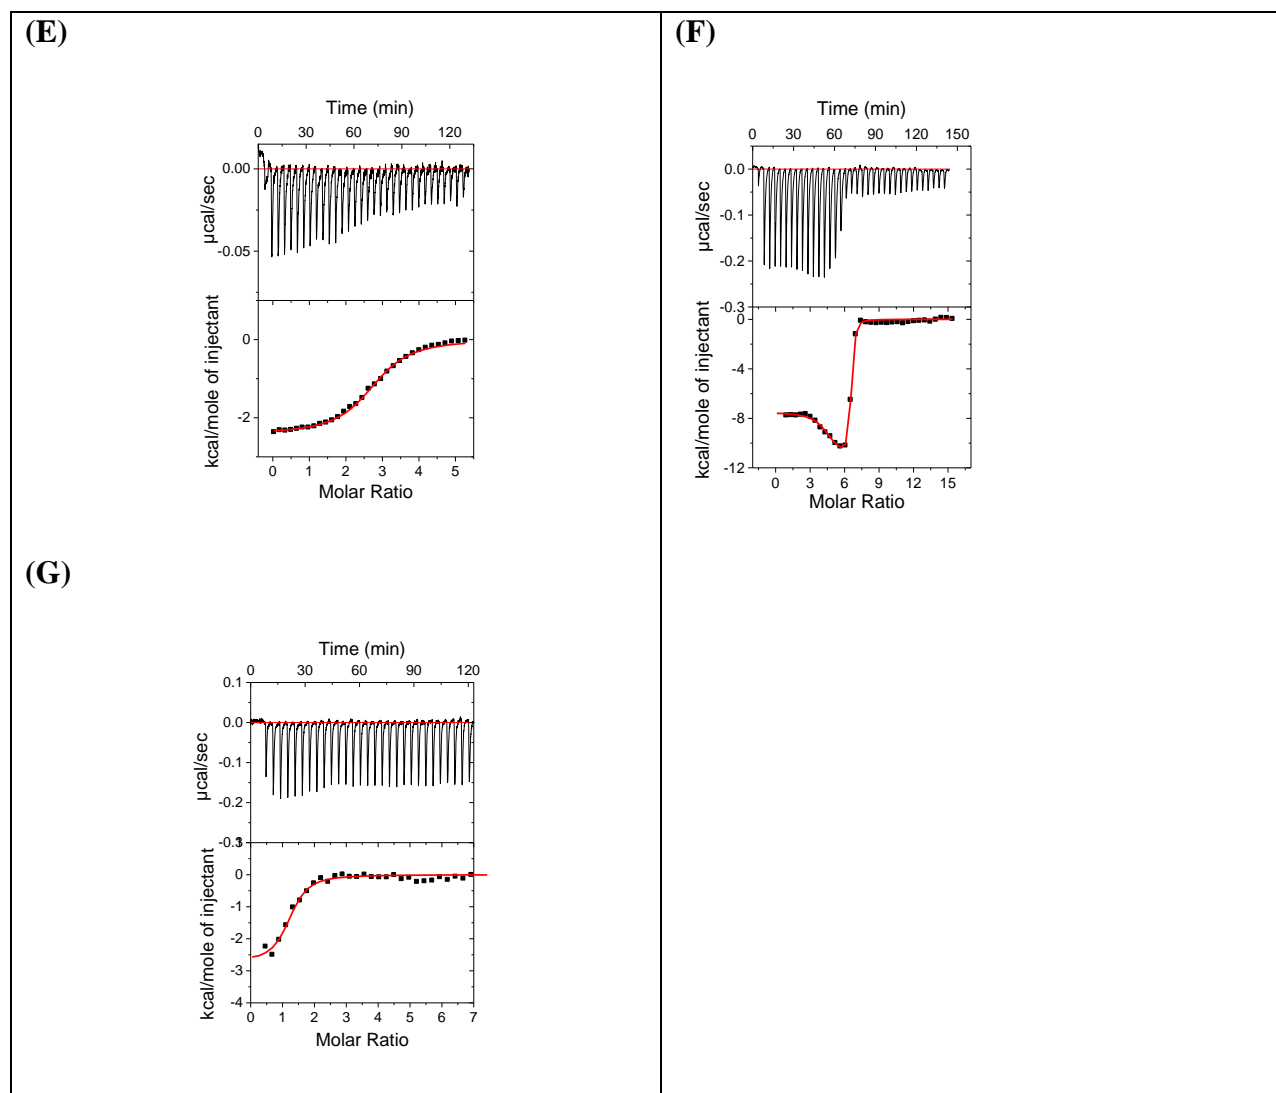

**Figure S23.** ITC profiles of **3** with (A) d[5'-(AT)<sub>8</sub>-3'], (B) d[5'-G<sub>2</sub>A<sub>6</sub>T<sub>6</sub>C<sub>2</sub>-3'], (C) d[5'-G<sub>3</sub>A<sub>5</sub>T<sub>5</sub>C<sub>3</sub>-3'], (D) d[5'-A<sub>12</sub>-x-T<sub>12</sub>-3'], (E) d[5'-A<sub>3</sub>G<sub>5</sub>C<sub>5</sub>T<sub>3</sub>-3'], (F) d[5'-A<sub>30</sub>T<sub>30</sub>-3'], and (G) d[5'-G<sub>3</sub>(AT)<sub>5</sub>C<sub>3</sub>-3']. Top Panel: ITC titrations represent the heat burst curves and each heat burst curve is a result of 9 µL injection of 125 µM of **3**, into the duplex DNA. The area under each heat burst curve was calculated by integration and yields the associated injection heats which were then plotted as a function of molar ratio of drug to DNA in the lower panel in each figure.. The corrected injection heats were derived by integration of the ITC profiles, followed by subtraction of the corresponding dilution heats obtained from titration of ligand into buffer. Buffer conditions: 100 mM KCl, 10 mM SC, 0.5 mM EDTA, pH 6.8. T = 25°C. [DNA] = 4 µM/duplex. [**3**] = 125 µM. d[5'-A<sub>30</sub>T<sub>30</sub>-3'] = 2 µM/duplex

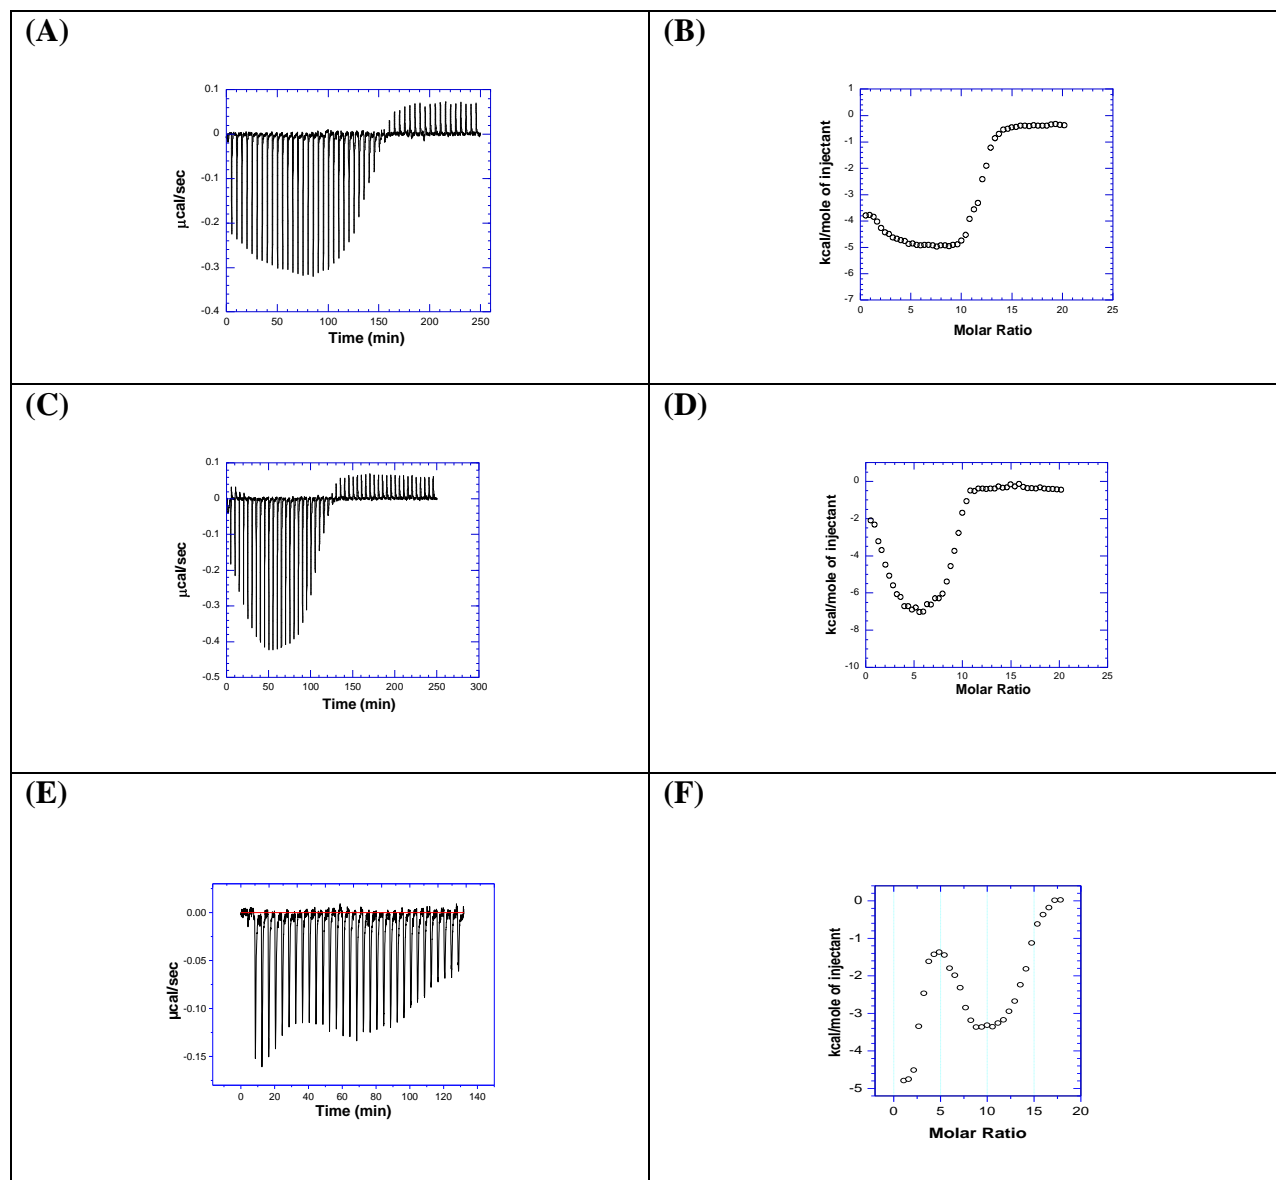

**Figure S24.** (A) ITC profile of sequence D8 (4 μM in strand) titrated with **3** (440 μM) in 150 mM KCl, 10 mM SC, 0.5 mM EDTA, pH 6.8, T = 25 °C. (B) Corrected injection heats plotted as a function of the [drug]/[sequence D8] ratio. (C) ITC profile of sequence D7 (4 μM in strand) titrated with **3** (440 μM) in 150 mM KCl, 10 mM SC, 0.5 mM EDTA, pH 6.8, T = 25 °C. (D) Corrected injection heats plotted as a function of the [drug]/[sequence D7] ratio. (E) ITC profile of sequence D10 (4 μM in strand) titrated with **3** (440 μM) in 150 mM KCl, 10 mM SC, 0.5 mM EDTA, pH 6.8, T = 25 °C. (F) Corrected injection heats plotted as a function of the [drug]/[sequence D10] ratio. The corrected injection heats were derived by integration of the ITC profiles, followed by subtraction of the corresponding dilution heats derived from titration of ligand into buffer.

**Sequence D8:**

5'-AAGAGGAGAGAAGAGAGGAGAA-3'

3'-TTCTCCTCTCTTCTCTCCTCTT-5'

**Sequence D7:**

5'-AAGGGAAAAAAAAAAAAAGGGAA-3'

3'-TTCCCTTTTTTTTTTTTCCCTT-5'

**Sequence D10:**

5'-AAGGGATATATATATATATGGGAA-3'

3'-TTCCCTATATATATATATACCCTT-5'

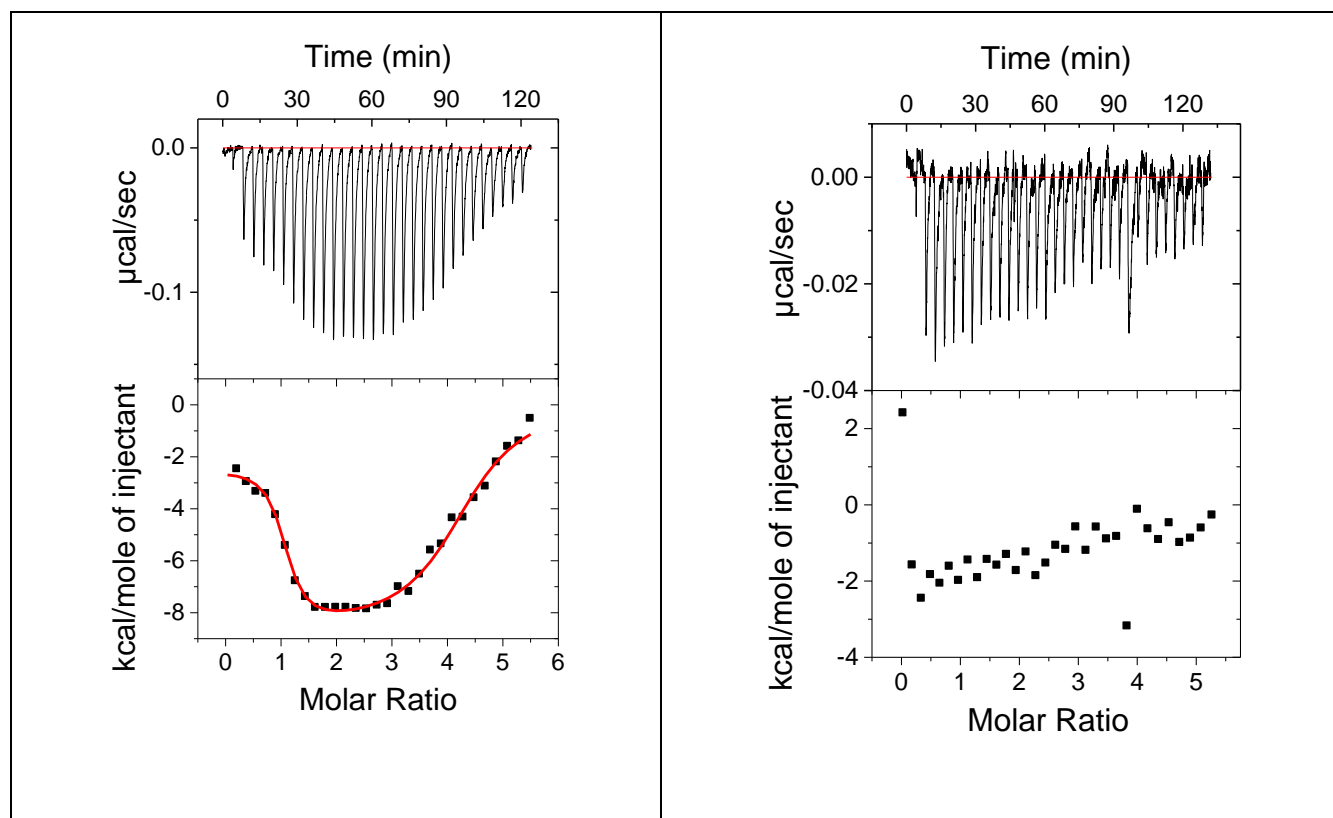

**Figure S25.** ITC-Derived thermodynamic profiles for the binding of **3** (left) and neomycin (right) with d[5'-G<sub>3</sub>A<sub>5</sub>T<sub>5</sub>C<sub>3</sub>-3']. Top Panel: ITC titration represents the heat burst curves and each heat burst curve is a result of 9  $\mu\text{L}$  injections of 125  $\mu\text{M}$  of **3** (left) and neomycin (right). The area under each heat burst curve was calculated by integration and yields the associated injection heats which are plotted as a function of molar ratio of drug to DNA in the lower panel in each figure. Bottom panel: Corrected injection heats plotted as a function of the [drug]/DNA ratio. The corrected injection heats were derived by integration of the ITC profiles, followed by subtraction of the corresponding dilution heats derived from titration of ligand into buffer. Buffer conditions: 100 mM KCl, 10 mM SC, 0.5 mM EDTA, pH 6.8.  $T = 25^\circ\text{C}$ . [DNA] = 4  $\mu\text{M}$ /duplex. [**3**] = 125  $\mu\text{M}$ . [neomycin] = 125  $\mu\text{M}$ . As opposed to dimer **3**, neomycin shows very weak binding as evident from the differences in heat evolved.

**Table S2. Thiazole orange FID Assay for 512-Member Deoxyoligonucleotide Library.** The 12 base-pair duplex has 10 variable AT base pairs flanked by two conserved CG base pairs. Sequence 1 corresponds to the sequence with little displacement of TO upon binding of **3**, suggesting it is the weakest binder of all. Sequence 512 showed the maximum displacement of TO upon binding of **3**. Buffer conditions: 100 mM KCl, 10 mM SC, 0.5 mM EDTA, pH 6.8. [DNA] = 1  $\mu$ M/strand. [**3**] = 1  $\mu$ M.

| S.No. | Sequence name                       | % Fluorescence |
|-------|-------------------------------------|----------------|
| 1     | 5'-CATATTTATATCAAAAAGATATAAATATG-3' | 99.852         |
| 2     | 5'-CATATATATATCAAAAAGATATATATATG-3' | 99.731         |
| 3     | 5'-CATAAATAAATCAAAAAGATTTATTTATG-3' | 99.718         |
| 4     | 5'-CATATAATATTCAAAAAGAATATTATATG-3' | 99.62          |
| 5     | 5'-CATAATTAATTCAAAAAGAATTAATTATG-3' | 99.509         |
| 6     | 5'-CATTTTAATTTCAAAAAGAAATTAATG-3'   | 99.458         |
| 7     | 5'-CATATATATTTCAAAAAGAAATATATATG-3' | 99.257         |
| 8     | 5'-CATATTTTAATCAAAAAGATTAATATG-3'   | 99.05          |
| 9     | 5'-CATAAATATTCAAAAAGAATTTTTATG-3'   | 98.946         |
| 10    | 5'-CATATATTTATCAAAAAGATAAATATATG-3' | 98.783         |
| 11    | 5'-CATATAAAAATCAAAAAGATTTTATATG-3'  | 98.718         |
| 12    | 5'-CATAATAAATCAAAAAGATTTTATTATG-3'  | 98.685         |
| 13    | 5'-CATTAATATTCAAAAAGAATTTTAATG-3'   | 98.368         |
| 14    | 5'-CATTATAAATCAAAAAGATTTTATAATG-3'  | 98.081         |
| 15    | 5'-CAAAATATTAACAAAAAGTTAATTTTTG-3'  | 98.076         |
| 16    | 5'-CATAAATTATCAAAAAGATAATTTTATG-3'  | 98.068         |
| 17    | 5'-CATAATATTATCAAAAAGATAATTATG-3'   | 97.968         |
| 18    | 5'-CATAAATTTTTCAAAAAGAAAAATTTATG-3' | 97.82          |

|    |                                     |        |
|----|-------------------------------------|--------|
| 19 | 5'-CATAAAATTTTCAAAAAGAAAATTTTATG-3' | 97.447 |
| 20 | 5'-CATTATAAATTCAAAAAGAATTTATAATG-3' | 97.395 |
| 21 | 5'-CATTATTTTTTCAAAAAGAAAAATAATG-3'  | 97.315 |
| 22 | 5'-CATTAAAATTTCAAAAAGAAATTTTAATG-3' | 97.17  |
| 23 | 5'-CATAATATATTCAAAAAGAATATATTATG-3' | 96.986 |
| 24 | 5'-CATTAATTTATCAAAAAGATAAATTAATG-3' | 96.652 |
| 25 | 5'-CATAAATAAAACAAAAAGTTTTATTTATG-3' | 96.54  |
| 26 | 5'-CATATTAAAATCAAAAAGATTTTAATATG-3' | 96.47  |
| 27 | 5'-CATATAATTTTCAAAAAGAAAATTATATG-3' | 96.331 |
| 28 | 5'-CATTATAATATCAAAAAGATATTATAATG-3' | 96.298 |
| 29 | 5'-CATTATATTTTCAAAAAGAAAATATAATG-3' | 96.137 |
| 30 | 5'-CATTAATATTTCAAAAAGAAATATTAATG-3' | 96.011 |
| 31 | 5'-CATAAAAATATCAAAAAGATATTTTTATG-3' | 95.996 |
| 32 | 5'-CATATTTAATTCAAAAAGAATTAAATATG-3' | 95.753 |
| 33 | 5'-CATATTTAAATCAAAAAGATTTAAATATG-3' | 95.751 |
| 34 | 5'-CATATTAATTTCAAAAAGAATTTAATATG-3' | 95.677 |
| 35 | 5'-CATAAATATATCAAAAAGATATTTTATG-3'  | 95.525 |
| 36 | 5'-CATATTATATTCAAAAAGAATATAATATG-3' | 95.412 |
| 37 | 5'-CATTTAAAAAACAAAAAGTTTTTTAAATG-3' | 95.396 |
| 38 | 5'-CATAATTTAATCAAAAAGTAATTTAATAG-3' | 95.32  |
| 39 | 5'-CATAAATTAATCAAAAAGATTAATTTATG-3' | 95.05  |
| 40 | 5'-CATATAAATATCAAAAAGATATTTATATG-3' | 94.939 |
| 41 | 5'-CATTATATAATCAAAAAGATTATATAATG-3' | 94.811 |

|    |                                       |        |
|----|---------------------------------------|--------|
| 42 | 5'-CATTATTAAATCAAAAAGATTTAATAATG-3'   | 94.751 |
| 43 | 5'-CATATATTTTTCAAAAAGAAAATATATG-3'    | 94.627 |
| 44 | 5'-CATAATTAATCAAAAAGATTTAATTATG-3'    | 94.571 |
| 45 | 5'-CAATAAAATATCAAAAAGATATTTTATTG-3'   | 94.55  |
| 46 | 5'-CATAAAATAATCAAAAAGATTATTTTATG-3'   | 94.539 |
| 47 | 5'-CATTA AAAATATCAAAAAGATATTTTAATG-3' | 94.489 |
| 48 | 5'-CATAATAATATCAAAAAGATATTATTATG-3'   | 94.409 |
| 49 | 5'-CATATAATAATCAAAAAGATTATTATATG-3'   | 94.284 |
| 50 | 5'-CATATATAATACAAAAGATTATATATATG-3'   | 94.208 |
| 51 | 5'-CATTATATTATCAAAAAGATAATATAATG-3'   | 94.111 |
| 52 | 5'-CATTAATAATTCAAAAAGAATTATTAATG-3'   | 93.997 |
| 53 | 5'-CATATTATAATCAAAAAGATTATAATATG-3'   | 93.895 |
| 54 | 5'-CATATATATTACAAAAGTAATATATATG-3'    | 93.872 |
| 55 | 5'-CAATAAAAATTCAAAAAGAATTTTATTG-3'    | 93.743 |
| 56 | 5'-CATAATTATATCAAAAAGATATAATTATG-3'   | 93.735 |
| 57 | 5'-CATTATTTAATCAAAAAGATTAAATAATG-3'   | 93.525 |
| 58 | 5'-CATAATTTTATCAAAAAGATAAAATTATG-3'   | 93.505 |
| 59 | 5'-CATAAATTTATCAAAAAGATAAATTTATG-3'   | 93.158 |
| 60 | 5'-CAAAAATAATCAAAAAGTATTATTTTTG-3'    | 93.146 |
| 61 | 5'-CATTAATTATTCAAAAAGAATAATTAATG-3'   | 93.118 |
| 62 | 5'-CAAATTTTAATCAAAAAGATTAAAATTTG-3'   | 93.03  |
| 63 | 5'-CATAATAAATTCAAAAAGAATTTATTATG-3'   | 92.746 |
| 64 | 5'-CATAAAAATTTCAAAAAGAAATTTTATG-3'    | 92.653 |



|    |                                      |        |
|----|--------------------------------------|--------|
| 65 | 5'-CAATAAAATAACAAAAAGTTATTTTATTG-3'  | 92.45  |
| 66 | 5'-CATAATATAATCAAAAAGATTATATTATG-3'  | 92.404 |
| 67 | 5'-CATTATATATTCAAAAAGAATATATAATG-3'  | 92.335 |
| 68 | 5'-CATTATTTATTCAAAAAGAATAAATAATG-3'  | 92.26  |
| 69 | 5'-CATATATTATTCAAAAAGAATAATATATG-3'  | 92.049 |
| 70 | 5'-CATAAATAATTCAAAAAGAATTATTTATG-3'  | 91.864 |
| 71 | 5'-CAAATTTAAACAAAAAGTTTAAATTTG-3'    | 91.8   |
| 72 | 5'-CATATTAATTTCAAAAAGAAATTAATATG-3'  | 91.728 |
| 73 | 5'-CAAATAAAAAACAAAAAGTTTTTTTATTG-3'  | 91.56  |
| 74 | 5'-CATATAAAATTCAAAAAGAATTTTATATG-3'  | 91.49  |
| 75 | 5'-CATTAATTATCAAAAAGATAATTTAATG-3'   | 91.3   |
| 76 | 5'-CATATTTTATTCAAAAAGAATAAAATATG-3'  | 91.165 |
| 77 | 5'-CATATATTAATCAAAAAGATTAATATATG-3'  | 91.14  |
| 78 | 5'-CATTAATAAATCAAAAAGATTTATTAATG-3'  | 91.12  |
| 79 | 5'-CATTATTATATCAAAAAGATATAATAATG-3'  | 90.951 |
| 80 | 5'-CATTAATTTTTCAAAAAGAAAATTAATG-3'   | 90.882 |
| 81 | 5'-CATATATAAATCAAAAAGATTTATATATG-3'  | 90.782 |
| 82 | 5'-CATTATAATTTCAAAAAGAAATTATAATG-3'  | 90.66  |
| 83 | 5'-CATATAAATTTCAAAAAGAAATTTATATG-3'  | 90.622 |
| 84 | 5'-CATTAATTTTTCAAAAAGAAAATTTAATG-3'  | 90.601 |
| 85 | 5'-CATATTATTATCAAAAAGATAATAATATG-3'  | 90.543 |
| 86 | 5'-CATAATTTTTTCAAAAAGAAAAATTATG-3'   | 90.354 |
| 87 | 5'-CATATTATTTTTCAAAAAGAAAATAATATG-3' | 90.318 |

|     |                                     |        |
|-----|-------------------------------------|--------|
| 88  | 5'-CATATTAATATCAAAAAGATATTAATATG-3' | 90.313 |
| 89  | 5'-CATATATAATTCAAAAAGAATTATATATG-3' | 90.299 |
| 90  | 5'-CATAATATTTTCAAAAAGAAAATATTATG-3' | 90.161 |
| 91  | 5'-CATATTTTTATCAAAAAGATAAAAATATG-3' | 90.157 |
| 92  | 5'-CATTAATAATCAAAAAGATTATTTAATG-3'  | 89.813 |
| 93  | 5'-CATATAATTATCAAAAAGATAATTATATG-3' | 89.748 |
| 94  | 5'-CATAAATTATTCAAAAAGAATAATTTATG-3' | 89.631 |
| 95  | 5'-CATTAATATATCAAAAAGATATATTAATG-3' | 89.472 |
| 96  | 5'-CATATTTATTTCAAAAAGAAATAAATATG-3' | 89.44  |
| 97  | 5'-CATTAATAAATCAAAAAGATTTTTTAATG-3' | 89.026 |
| 98  | 5'-CAATATATAATCAAAAAGATTATATATTG-3' | 89.005 |
| 99  | 5'-CAATATTTAATCAAAAAGATTAAATATTG-3' | 88.948 |
| 100 | 5'-CATTTAATAAACAAAAAGTTTATTAATG-3'  | 88.881 |
| 101 | 5'-CATAAATATTTCAAAAAGAAATATTTATG-3' | 88.819 |
| 102 | 5'-CATTAATTAATCAAAAAGATTAATTAATG-3' | 88.715 |
| 103 | 5'-CAATAATATAACAAAAAGTTATATTATTG-3' | 88.654 |
| 104 | 5'-CATTTATTATTCAAAAAGAATAATAAATG-3' | 88.478 |
| 105 | 5'-CATATATATAACAAAAAGTTATATATATG-3' | 88.344 |
| 106 | 5'-CAAATAAATTTCAAAAAGAAATTTATTG-3'  | 88.257 |
| 107 | 5'-CATAATTTATTCAAAAAGAATAAATTATG-3' | 88.247 |
| 108 | 5'-CAAATATATATCAAAAAGATATATATTTG-3' | 88.23  |
| 109 | 5'-CATTTATATATCAAAAAGATATATAAATG-3' | 88.087 |
| 110 | 5'-CATATTTTTTTTCAAAAAGAAAAAATATG-3' | 88.077 |

|     |                                      |        |
|-----|--------------------------------------|--------|
| 111 | 5'-CAAAATTTAATCAAAAAGATTAAATTTTG-3'  | 87.9   |
| 112 | 5'-CATTAAAATTCAAAAAGAATTTTAAATG-3'   | 87.879 |
| 113 | 5'-CAAAAATATAACAAAAAGTTATATTTTGG-3'  | 87.837 |
| 114 | 5'-CAATATATATACAAAAAGTATATATATTG-3'  | 87.82  |
| 115 | 5'-CAAAAAAATACAAAAAGTATTTTTTTTG-3'   | 87.697 |
| 116 | 5'-CATTATTATTTCAAAAAGAAATAATAATG-3'  | 87.493 |
| 117 | 5'-CAAATAAAATACAAAAAGTATTTTATTG-3'   | 87.486 |
| 118 | 5'-CAAATATTAATCAAAAAGATTAAATTTG-3'   | 87.468 |
| 119 | 5'-CATTATTTTATCAAAAAGATAAAAATAATG-3' | 87.384 |
| 120 | 5'-CAAAAATATTACAAAAAGTAATATTTTGG-3'  | 87.014 |
| 121 | 5'-CAAATATTATACAAAAAGTATAATTTG-3'    | 86.996 |
| 122 | 5'-CAATAAAAAATCAAAAAGATTTTTTATTG-3'  | 86.913 |
| 123 | 5'-CATTATATATACAAAAAGTATATATAATG-3'  | 86.908 |
| 124 | 5'-CAAATATAATTCAAAAAGAATTATATTG-3'   | 86.734 |
| 125 | 5'-CAAATATTTTTCAAAAAGAAAATATTTG-3'   | 86.718 |
| 126 | 5'-CAAAAATTAACAAAAAGTTTAATTTTGG-3'   | 86.672 |
| 127 | 5'-CATTTAAAATCAAAAAGATTTTAAATG-3'    | 86.523 |
| 128 | 5'-CATAATTATTTCAAAAAGAAATAATTATG-3'  | 86.499 |
| 129 | 5'-CAAATAAAAAATCAAAAAGATTTTTATTG-3'  | 86.45  |
| 130 | 5'-CATTTTAATATCAAAAAGATATTAATAATG-3' | 86.351 |
| 131 | 5'-CATTTTTAATACAAAAAGTATTAATAATG-3'  | 86.327 |
| 132 | 5'-CAAATAATATACAAAAAGTATATTATTG-3'   | 86.289 |
| 133 | 5'-CAAATAAATTACAAAAAGTAATTTATTG-3'   | 86.258 |

|     |                                       |        |
|-----|---------------------------------------|--------|
| 134 | 5'-CAATATTAATTCAAAAAGAATTAATATTG-3'   | 86.098 |
| 135 | 5'-CAAAATATAAACAAAAAGTTTATATTTTG-3'   | 86.074 |
| 136 | 5'-CATTTTAAAATCAAAAAGATTTTAAAATG-3'   | 85.867 |
| 137 | 5'-CAATAATAAATCAAAAAGATTTATTATTG-3'   | 85.847 |
| 138 | 5'-CAAATTTAATACAAAAAGTATTAAATTTG-3'   | 85.64  |
| 139 | 5'-CAAATTATATTCAAAAAGAATATAATTTG-3'   | 85.605 |
| 140 | 5'-CATTTATTAATCAAAAAGATTAATAAATG-3'   | 85.413 |
| 141 | 5'-CAAATATAAATCAAAAAGATTTATATTTG-3'   | 85.368 |
| 142 | 5'-CAAAATATTTACAAAAAGTAAATATTTTG-3'   | 85.317 |
| 143 | 5'-CATTTTTTAAACAAAAAGTTTAAAAAATG-3'   | 85.308 |
| 144 | 5'-CAAATAATAAACAAAAAGTTTATTATTTG-3'   | 85.307 |
| 145 | 5'-CAATATAAAATCAAAAAGATTTTATATTG-3'   | 85.204 |
| 146 | 5'-CAAATATAATACAAAAAGTATTATATTTG-3'   | 85.083 |
| 147 | 5'-CATTTAAATTACAAAAAGTAATTTAAATG-3'   | 85.025 |
| 148 | 5'-CAATTA AAAATACAAAAAGTATTTTAATTG-3' | 84.917 |
| 149 | 5'-CAATATATTAACAAAAAGTTAATATATTG-3'   | 84.822 |
| 150 | 5'-CATAATAATTTCAAAAAGAAATTATTATG-3'   | 84.785 |
| 151 | 5'-CAAATAAATATCAAAAAGATTTTATTTG-3'    | 84.758 |
| 152 | 5'-CAAATTAATATCAAAAAGATTAATTTG-3'     | 84.758 |
| 153 | 5'-CAAAAATTAACAAAAAGTTAATTTTTTG-3'    | 84.704 |
| 154 | 5'-CAAATAAAATTCAAAAAGAATTTTATTTG-3'   | 84.65  |
| 155 | 5'-CAATATAATTACAAAAAGTAATTATATTG-3'   | 84.567 |
| 156 | 5'-CATTATTAATTCAAAAAGAATTAATAATG-3'   | 84.519 |

|     |                                      |        |
|-----|--------------------------------------|--------|
| 157 | 5'-CAAATAATAATCAAAAAGATTATTATTTG-3'  | 84.48  |
| 158 | 5'-CAAATATATTTCAAAAAGAAATATATTTG-3'  | 84.461 |
| 159 | 5'-CAAATAAATAACAAAAAGTTATTTATTTG-3'  | 84.421 |
| 160 | 5'-CAATTAATAACAAAAAGTTATTTAATTG-3'   | 84.378 |
| 161 | 5'-CAATAAAATTTCAAAAAGAAATTTTATTG-3'  | 84.27  |
| 162 | 5'-CAATTTATATTTCAAAAAGAATATAAATTG-3' | 84.194 |
| 163 | 5'-CATTTATATTACAAAAAGTAATATAAATG-3'  | 84.124 |
| 164 | 5'-CAATATAATAACAAAAAGTTATTATATTG-3'  | 84.091 |
| 165 | 5'-CATATTATTTACAAAAAGTAAATAATATG-3'  | 84.067 |
| 166 | 5'-CAAATTTTAAACAAAAAGTTAAAATTTTG-3'  | 83.96  |
| 167 | 5'-CAATAATATTACAAAAAGTAATATTATTG-3'  | 83.941 |
| 168 | 5'-CAATTAATATTCAAAAAGAATATTAATTG-3'  | 83.908 |
| 169 | 5'-CAATATAAATTCAAAAAGAATTTATATTG-3'  | 83.879 |
| 170 | 5'-CAAATTATATACAAAAAGTATATAATTTG-3'  | 83.784 |
| 171 | 5'-CAATAATTTATCAAAAAGATAAATTATTG-3'  | 83.767 |
| 172 | 5'-CAAAAAAAATTCAAAAAGAATTTTTTTTG-3'  | 83.743 |
| 173 | 5'-CATTATTAATACAAAAAGTATTAATAATG-3'  | 83.686 |
| 174 | 5'-CAATTATAATTCAAAAAGAATTATAATTG-3'  | 83.655 |
| 175 | 5'-CATATTATTAACAAAAAGTTAATAATATG-3'  | 83.605 |
| 176 | 5'-CAAAAAATATACAAAAAGTATATTTTTTG-3'  | 83.586 |
| 177 | 5'-CATTTAAAATTCAAAAAGAATTTTAAATG-3'  | 83.56  |
| 178 | 5'-CAATAATTATACAAAAAGTATAATTATTG-3'  | 83.534 |
| 179 | 5'-CAAATTATAACAAAAAGTTATAATTTTG-3'   | 83.524 |

|     |                                     |        |
|-----|-------------------------------------|--------|
| 180 | 5'-CAAAAATAATTCAAAAAGAATTATTTTTG-3' | 83.484 |
| 181 | 5'-CAATTTAATATCAAAAAGATATTAATTG-3'  | 83.445 |
| 182 | 5'-CATTTAATTATCAAAAAGATAATTAATG-3'  | 83.387 |
| 183 | 5'-CAATAATATATCAAAAAGATATATTATTG-3' | 83.381 |
| 184 | 5'-CATTATAAATACAAAAAGTATTTATAATG-3' | 83.314 |
| 185 | 5'-CAAAATATATACAAAAAGTATATATTTTG-3' | 83.275 |
| 186 | 5'-CAATATTATTTCAAAAAGAAATAATATTG-3' | 83.18  |
| 187 | 5'-CAAATTATTATCAAAAAGATAATAATTTG-3' | 83.172 |
| 188 | 5'-CAAATAATTTTCAAAAAGAAAATTATTTG-3' | 82.773 |
| 189 | 5'-CATTTTATAATCAAAAAGATTATAAAATG-3' | 82.647 |
| 190 | 5'-CAAAATAAATACAAAAAGTATTTATTTTG-3' | 82.538 |
| 191 | 5'-CAATATTTATTCAAAAAGAATAAATATTG-3' | 82.509 |
| 192 | 5'-CAATTATTAATCAAAAAGATTAATAATTG-3' | 82.409 |
| 193 | 5'-CAATTTATTAACAAAAAGTTAATAAATTG-3' | 82.371 |
| 194 | 5'-CAAAAATAAAACAAAAAGTTTTATTTTTG-3' | 82.285 |
| 195 | 5'-CAATATATATTCAAAAAGAATATATATTG-3' | 82.281 |
| 196 | 5'-CATTAATTTAACAAAAAGTTAAATTAATG-3' | 82.258 |
| 197 | 5'-CAATTTTAAAACAAAAAGTTTTAAAATTG-3' | 82.214 |
| 198 | 5'-CAAATTATAATCAAAAAGATTATAATTTG-3' | 82.127 |
| 199 | 5'-CAAATATATTACAAAAAGTAATATATTTG-3' | 82.07  |
| 200 | 5'-CAATTATATTACAAAAAGTAATATAATTG-3' | 81.994 |
| 201 | 5'-CATATATAAAACAAAAAGTTTTATATATG-3' | 81.856 |
| 202 | 5'-CATTATTTTTACAAAAAGTAAAAATAATG-3' | 81.779 |

|     |                                     |        |
|-----|-------------------------------------|--------|
| 203 | 5'-CATTTAAAATACAAAAAGTATTTTAAATG-3' | 81.71  |
| 204 | 5'-CATTAATAAAACAAAAAGTTTTATTAATG-3' | 81.7   |
| 205 | 5'-CATAAAATTAACAAAAAGTTAATTTTATG-3' | 81.696 |
| 206 | 5'-CAATTTATAATCAAAAAGATTATAAATTG-3' | 81.651 |
| 207 | 5'-CATATATTAACAAAAAGTTAATATATG-3'   | 81.556 |
| 208 | 5'-CAATTAATAATCAAAAAGATTATTAATTG-3' | 81.518 |
| 209 | 5'-CAATATTATATCAAAAAGATATAATATTG-3' | 81.464 |
| 210 | 5'-CATAAAATAAACAAAAAGTTTATTTTATG-3' | 81.448 |
| 211 | 5'-CATTAATTTACAAAAAGTAAATTTAATG-3'  | 81.315 |
| 212 | 5'-CATTTTTTATACAAAAAGTATAAAAAATG-3' | 81.23  |
| 213 | 5'-CAATAATTTAACAAAAAGTTAAATTATTG-3' | 81.208 |
| 214 | 5'-CATTAAAATTACAAAAAGTAATTTTAATG-3' | 81.201 |
| 215 | 5'-CAATTAATTATCAAAAAGATAATTAATTG-3' | 81.173 |
| 216 | 5'-CAATAATTATTCAAAAAGAATAATTATTG-3' | 81.166 |
| 217 | 5'-CAATTAATATACAAAAAGTATATTAATTG-3' | 81.141 |
| 218 | 5'-CAAATAATTATCAAAAAGATAATTATTTG-3' | 81.052 |
| 219 | 5'-CAATATTAATACAAAAAGTATTAATATTG-3' | 81.044 |
| 220 | 5'-CAATTATTTAACAAAAAGTTAAATAATTG-3' | 81.026 |
| 221 | 5'-CATTTTATATACAAAAAGTATATAAAATG-3' | 81.024 |
| 222 | 5'-CAATATATTTACAAAAAGTAAATATATTG-3' | 81.011 |
| 223 | 5'-CATTATTTTAACAAAAAGTTAAAATAATG-3' | 80.92  |
| 224 | 5'-CAAAAATTTACAAAAAGTAAATTTTTTG-3'  | 80.916 |
| 225 | 5'-CATATTATATACAAAAAGTATATAATATG-3' | 80.914 |

|     |                                      |        |
|-----|--------------------------------------|--------|
| 226 | 5'-CAATTTTATTCAAAAAGAATAAAAATTG-3'   | 80.899 |
| 227 | 5'-CAATAAATTAACAAAAAGTTAATTTATTG-3'  | 80.886 |
| 228 | 5'-CAATTAAATATCAAAAAGATATTTAATTG-3'  | 80.844 |
| 229 | 5'-CAATTTTATAACAAAAAGTTATAAAATTG-3'  | 80.813 |
| 230 | 5'-CATTTTATTTTCAAAAAGAAAATAAAATG-3'  | 80.812 |
| 231 | 5'-CAATTTAATAACAAAAAGTTATTAATTG-3'   | 80.807 |
| 232 | 5'-CAATTAATAATCAAAAAGATTTTTAATTG-3'  | 80.63  |
| 233 | 5'-CAAAATTATATCAAAAAGATATAATTTTG-3'  | 80.625 |
| 234 | 5'-CATTTATAATACAAAAAGTATTATAAATG-3'  | 80.543 |
| 235 | 5'-CAATATAAATACAAAAAGTATTTATATTG-3'  | 80.485 |
| 236 | 5'-CAATTATATATCAAAAAGATATATAATTG-3'  | 80.456 |
| 237 | 5'-CAAATTTTATACAAAAAGTATAAAATTTG-3'  | 80.351 |
| 238 | 5'-CAATATTAATCAAAAAGATTTAATATTG-3'   | 80.293 |
| 239 | 5'-CAAAATAATAACAAAAAGTTATTATTTTG-3'  | 80.286 |
| 240 | 5'-CATTTTTAAATCAAAAAGATTTAAAATG-3'   | 80.22  |
| 241 | 5'-CATAAAAATTACAAAAAGTAATTTTATG-3'   | 80.205 |
| 242 | 5'-CAATTAATAAACAAAAAGTTTTTAATTG-3'   | 80.181 |
| 243 | 5'-CAATTAATTTTCAAAAAGAAAATTAATTG-3'  | 80.181 |
| 244 | 5'-CATTAATAATACAAAAAGTATTTTAAATG-3'  | 80.168 |
| 245 | 5'-CAATAAATATACAAAAAGTATTTTATTG-3'   | 80.164 |
| 246 | 5'-CATTAATAATAACAAAAAGTTTTTTAATG-3'  | 80.136 |
| 247 | 5'-CAATATTAATAACAAAAAGTTTTAATATTG-3' | 80.109 |
| 248 | 5'-CAAAATATATCAAAAAGATATATTTTGTG-3'  | 79.997 |



|     |                                     |        |
|-----|-------------------------------------|--------|
| 249 | 5'-CATAATATAAACAAAAAGTTTATATTATG-3' | 79.989 |
| 250 | 5'-CATAAAAAAATCAAAAAGATTTTTTTATG-3' | 79.95  |
| 251 | 5'-CAATTTAAAATCAAAAAGATTTTAAATTG-3' | 79.947 |
| 252 | 5'-CATATATTTAACAAAAAGTTAAATATATG-3' | 79.901 |
| 253 | 5'-CATATTTTATACAAAAAGTATAAAATATG-3' | 79.896 |
| 254 | 5'-CAAATAATTACAAAAAGTAATTATTTG-3'   | 79.889 |
| 255 | 5'-CATAATTTAAACAAAAAGTTTAAATTATG-3' | 79.851 |
| 256 | 5'-CAATATTATAACAAAAAGTTATAATATTG-3' | 79.836 |
| 257 | 5'-CAATAATTTTTCAAAAAGAAAAATTATTG-3' | 79.793 |
| 258 | 5'-CAATAATTAACAAAAAGTTTAATTATTG-3'  | 79.784 |
| 259 | 5'-CATTTTAAATTCAAAAAGAATTTAAAATG-3' | 79.747 |
| 260 | 5'-CATATTTTAAACAAAAAGTTTAAAATATG-3' | 79.726 |
| 261 | 5'-CAAATATTAAACAAAAAGTTTAATATTTG-3' | 79.664 |
| 262 | 5'-CAATAAATATTCAAAAAGAATTTTATTG-3'  | 79.571 |
| 263 | 5'-CAATTTATTTACAAAAAGTAAATAAATTG-3' | 79.473 |
| 264 | 5'-CATATTTAATACAAAAAGTATTAATATG-3'  | 79.45  |
| 265 | 5'-CAAATTTTTATCAAAAAGATAAAAATTTG-3' | 79.444 |
| 266 | 5'-CATAAAATATACAAAAAGTATTTTTATG-3'  | 79.4   |
| 267 | 5'-CATATTATAAACAAAAAGTTTATAATATG-3' | 79.391 |
| 268 | 5'-CAAAAATTTATCAAAAAGATAAATTTTTG-3' | 79.359 |
| 269 | 5'-CATTTATTAACAAAAAGTTTAATAAATG-3'  | 79.35  |
| 270 | 5'-CAAATATTATTCAAAAAGAATAATATTTG-3' | 79.324 |
| 271 | 5'-CAAATTAATACAAAAAGTATTTAATTTG-3'  | 79.246 |

|     |                                      |        |
|-----|--------------------------------------|--------|
| 272 | 5'-CAATTAATTAACAAAAAGTTAATTAATTG-3'  | 79.236 |
| 273 | 5'-CAATAAATTTTCAAAAAGAAAATTTATTG-3'  | 79.219 |
| 274 | 5'-CATATATTATACAAAAAGTATAATATATG-3'  | 79.166 |
| 275 | 5'-CAATTATTATACAAAAAGTATAATAATTG-3'  | 79.146 |
| 276 | 5'-CAATTATAATACAAAAAGTATTATAATTG-3'  | 79.144 |
| 277 | 5'-CAAATATTTAACAAAAAGTTAAATATTTG-3'  | 79.14  |
| 278 | 5'-CAAATTAATTTCAAAAAGAAATTAATTTG-3'  | 79.067 |
| 279 | 5'-CATATTTAAAACAAAAAGTTTTAAATATG-3'  | 79.045 |
| 280 | 5'-CATATTTATTACAAAAAGTAATAAATATG-3'  | 79.013 |
| 281 | 5'-CATTTTTATTTCAAAAAGAAATAAAAATG-3'  | 78.987 |
| 282 | 5'-CAAAAATTATCAAAAAGATAATTTTTTG-3'   | 78.954 |
| 283 | 5'-CATAATTTTAACAAAAAGTTAAAATTATG-3'  | 78.944 |
| 284 | 5'-CAATATTTAAACAAAAAGTTTAAATATTG-3'  | 78.931 |
| 285 | 5'-CAATTTTAATACAAAAAGTATTAATAATTG-3' | 78.877 |
| 286 | 5'-CAATAATATTTCAAAAAGAAATATTATTG-3'  | 78.798 |
| 287 | 5'-CATAAAAATAACAAAAAGTTATTTTTATG-3'  | 78.683 |
| 288 | 5'-CATTAATAAACAAAAAGTTTATTTAATG-3'   | 78.678 |
| 289 | 5'-CATAATAATAACAAAAAGTTATTATTATG-3'  | 78.667 |
| 290 | 5'-CAATATTTTAACAAAAAGTTAAAATATTG-3'  | 78.658 |
| 291 | 5'-CAAAAATTTTACAAAAAGTAAAATTTTTG-3'  | 78.543 |
| 292 | 5'-CATTAATATACAAAAAGTATATTTAATG-3'   | 78.533 |
| 293 | 5'-CATATTTTTAACAAAAAGTTAAAATATG-3'   | 78.49  |
| 294 | 5'-CAATTTATATACAAAAAGTATATAAATTG-3'  | 78.472 |

|     |                                     |        |
|-----|-------------------------------------|--------|
| 295 | 5'-CATTAAAATAACAAAAAGTTATTTTAATG-3' | 78.4   |
| 296 | 5'-CAATAAATTATCAAAAAGATAATTTATTG-3' | 78.356 |
| 297 | 5'-CAAATTATTTTCAAAAAGAAAATAATTTG-3' | 78.306 |
| 298 | 5'-CATTATATTTACAAAAAGTAAATATAATG-3' | 78.257 |
| 299 | 5'-CAATAAATAATCAAAAAGATTATTTATTG-3' | 78.25  |
| 300 | 5'-CAAATTATAAACAAAAAGTTTATAATTTG-3' | 78.249 |
| 301 | 5'-CAATTTAAATACAAAAAGTATTTAAATTG-3' | 78.113 |
| 302 | 5'-CAAATTAACAAAAAGTTTTAATTTG-3'     | 78.069 |
| 303 | 5'-CATTAATAATACAAAAAGTATTATTAATG-3' | 78.05  |
| 304 | 5'-CATATAAAATACAAAAAGTATTTTATATG-3' | 78.006 |
| 305 | 5'-CATTATAATAACAAAAAGTTATTATAATG-3' | 77.977 |
| 306 | 5'-CATTATATAAACAAAAAGTTTATATAATG-3' | 77.946 |
| 307 | 5'-CAATTTATAAACAAAAAGTTTATAAATTG-3' | 77.892 |
| 308 | 5'CAATTATTATTCAAAAAGAATAATAATTG-3'  | 77.872 |
| 309 | 5'-CAATTTAAATTCAAAAAGAATTTAAATTG-3' | 77.829 |
| 310 | 5'-CAATTATTAACAAAAAGTTTAATAATTG-3'  | 77.803 |
| 311 | 5'-CATATTTATAACAAAAAGTTATAAATATG-3' | 77.768 |
| 312 | 5'-CAAATTTTAAACAAAAAGTTTAAAATTTG-3' | 77.67  |
| 313 | 5'-CAATTTTATTACAAAAAGTAATAAAATTG-3' | 77.646 |
| 314 | 5'-CATTATAAAAACAAAAAGTTTTTATAATG-3' | 77.611 |
| 315 | 5'-CATAATTTATACAAAAAGTATAAATTATG-3' | 77.558 |
| 316 | 5'-CATTTTTATAACAAAAAGTTATAAAAATG-3' | 77.4   |
| 317 | 5'-CAAATTTATATCAAAAAGATATAAATTTG-3' | 77.399 |

|     |                                      |        |
|-----|--------------------------------------|--------|
| 318 | 5'-CATTTATTTTTCAAAAAGAAAAATAAATG-3'  | 77.233 |
| 319 | 5'-CATAATAATTACAAAAGTAATTATTATG-3'   | 77.173 |
| 320 | 5'-CAATTATAAAAACAAAAGTTTTATAATTG-3'  | 77.135 |
| 321 | 5'-CATAATTTTTACAAAAGTAAAAATTATG-3'   | 77.088 |
| 322 | 5'-CAAAATAAATTCAAAAAGAATTTATTTTG-3'  | 76.995 |
| 323 | 5'-CAATAATTAATCAAAAAGATTAATTATTG-3'  | 76.995 |
| 324 | 5'-CATTTATAATTCAAAAAGAATTATAAATG-3'  | 76.994 |
| 325 | 5'-CATTATTATAACAAAAGTTATAATAATG-3'   | 76.985 |
| 326 | 5'-CATTTTTTTATTCAAAAAGAATAAAAAATG-3' | 76.982 |
| 327 | 5'-CAATATAAAAACAAAAGTTTTTATATTG-3'   | 76.96  |
| 328 | 5'-CATTAATTAACAAAAGTTAATTTAATG-3'    | 76.934 |
| 329 | 5'-CAAATTTTATTCAAAAAGAATAAAATTTG-3'  | 76.865 |
| 330 | 5'-CATTAATATTACAAAAGTAATATTAATG-3'   | 76.827 |
| 331 | 5'-CATTAATTAACAAAAGTTAATTAATG-3'     | 76.794 |
| 332 | 5'-CAATATAATTTCAAAAAGAAATTATATTG-3'  | 76.745 |
| 333 | 5'-CAAATAATTAACAAAAGTTAATTATTTG-3'   | 76.725 |
| 334 | 5'-CAAATTAATACAAAAGTATTAATTTTG-3'    | 76.711 |
| 335 | 5'-CATTTATTATACAAAAGTATAATAAATG-3'   | 76.623 |
| 336 | 5'-CAAAATATATTCAAAAAGAATATATTTTG-3'  | 76.614 |
| 337 | 5'-CAAAAATTAATCAAAAAGATTAATTTTG-3'   | 76.56  |
| 338 | 5'-CAATTATATAACAAAAGTTATATAATTG-3'   | 76.537 |
| 339 | 5'-CATTAATTATACAAAAGTATAATTAATG-3'   | 76.517 |
| 340 | 5'-CAAAAATTATTCAAAAAGAATAATTTTG-3'   | 76.412 |

|     |                                     |        |
|-----|-------------------------------------|--------|
| 341 | 5'-CATTTTTAATTCAAAAAGAATTAAAAATG-3' | 76.403 |
| 342 | 5'-CATATAAAAACAAAAGTTTTTTATATG-3'   | 76.368 |
| 343 | 5'-CAATAAATAAACAAAAGTTTATTTATTG-3'  | 76.327 |
| 344 | 5'-CAATATAATATCAAAAAGATATTATATTG-3' | 76.291 |
| 345 | 5'-CATTTAATTTTCAAAAAGAAAATTAAATG-3' | 76.199 |
| 346 | 5'-CAAATAATATCAAAAAGATATTATTTTG-3'  | 76.166 |
| 347 | 5'-CAAATTTAAAACAAAAGTTTTAAATTTG-3'  | 76.122 |
| 348 | 5'-CATAAAATTTACAAAAGTAAATTTTATG-3'  | 76.031 |
| 349 | 5'-CAAATATTTTACAAAAGTAAATATTTG-3'   | 75.981 |
| 350 | 5'-CATTTTATTTACAAAAGTAAATAAAATG-3'  | 75.979 |
| 351 | 5'-CATAAATTAACAAAAGTTTAATTTATG-3'   | 75.95  |
| 352 | 5'-CAATTTAATTTCAAAAAGAAATTAATTG-3'  | 75.882 |
| 353 | 5'-CATTTTTATTACAAAAGTAATAAAAATG-3'  | 75.861 |
| 354 | 5'-CAAATTATTACAAAAGTAATAATTTTG-3'   | 75.806 |
| 355 | 5'-CAAATTATTTACAAAAGTAAATAATTTG-3'  | 75.795 |
| 356 | 5'-CAATTTTTAAACAAAAGTTTAAAAATTG-3'  | 75.724 |
| 357 | 5'-CATATTAAAAACAAAAGTTTTTAATATG-3'  | 75.71  |
| 358 | 5'-CATTAATATAACAAAAGTTATATTAATG-3'  | 75.653 |
| 359 | 5'-CAATTATTTTTCAAAAAGAAAATAATTG-3'  | 75.644 |
| 360 | 5'-CAAATAAAAACAAAAGTTTTTATTTTG-3'   | 75.616 |
| 361 | 5'-CAATATATAAACAAAAGTTTATATATTG-3'  | 75.586 |
| 362 | 5'-CAATATATTATCAAAAAGATAATATATTG-3' | 75.553 |
| 363 | 5'-CATAAAAATTCAAAAAGAATTTTTTATG-3'  | 75.549 |

|     |                                      |        |
|-----|--------------------------------------|--------|
| 364 | 5'-CAAAAATAAATCAAAAAGATTTATTTTTG-3'  | 75.422 |
| 365 | 5'-CATTTATTTTACAAAAAGTAAAATAAATG-3'  | 75.361 |
| 366 | 5'-CATATTAATTACAAAAAGTAATTAATATG-3'  | 75.324 |
| 367 | 5'-CATTTTATAAACAAAAAGTTTATAAAAATG-3' | 75.208 |
| 368 | 5'-CAAATTTAATTCAAAAAGAATTAATTTG-3'   | 75.144 |
| 369 | 5'-CAATATTTTATCAAAAAGATAAAAATATTG-3' | 75.076 |
| 370 | 5'-CAATTATTTTACAAAAAGTAAAATAATTG-3'  | 75.073 |
| 371 | 5'-CAAAAAAATTACAAAAAGTAATTTTTTTG-3'  | 75.029 |
| 372 | 5'-CATTATTTAAACAAAAAGTTTTAATAATG-3'  | 75.01  |
| 373 | 5'-CATATAATAAACAAAAAGTTTATTATATG-3'  | 75.003 |
| 374 | 5'-CAAATATTTTATCAAAAAGATAAATATTTG-3' | 74.98  |
| 375 | 5'-CATAATAAATACAAAAAGTATTTATTATG-3'  | 74.919 |
| 376 | 5'-CATTTTATTAACAAAAAGTTAATAAAAATG-3' | 74.912 |
| 377 | 5'-CATTTTATTATCAAAAAGATAAATAAATG-3'  | 74.815 |
| 378 | 5'-CATTTATATAACAAAAAGTTATATAAATG-3'  | 74.735 |
| 379 | 5'-CAAAAAATATTCAAAAAGAATATTTTTTTG-3' | 74.633 |
| 380 | 5'-CAATTTTTTTTCAAAAAGAAAAAAATTG-3'   | 74.615 |
| 381 | 5'-CAATTATATTTCAAAAAGAAATATAATTG-3'  | 74.571 |
| 382 | 5'-CAAATTTTATCAAAAAGATAAAAATTTG-3'   | 74.541 |
| 383 | 5'-CATAATTTAAACAAAAAGTTTTAATTATG-3'  | 74.541 |
| 384 | 5'-CATATAATTAACAAAAAGTTAATTATATG-3'  | 74.486 |
| 385 | 5'-CAAATAATATTCAAAAAGAATATTATTTG-3'  | 74.474 |
| 386 | 5'-CATAAATATAACAAAAAGTTATATTTATG-3'  | 74.401 |

|     |                                      |        |
|-----|--------------------------------------|--------|
| 387 | 5'-CAATATTTATACAAAAAGTATAAATATTG-3'  | 74.173 |
| 388 | 5'-CATAAAAAAACAAAAAGTTTTTTTTATG-3'   | 74.173 |
| 389 | 5'-CATAAAAAATACAAAAAGTATTTTTTATG-3'  | 74.068 |
| 390 | 5'-CAAATTAATTCAAAAAGAATTTAATTTG-3'   | 74.055 |
| 391 | 5'-CAAAAAATAAACAAAAAGTTTATTTTTTG-3'  | 73.86  |
| 392 | 5'-CATATTTTTTACAAAAAGTAAAAAATATG-3'  | 73.839 |
| 393 | 5'-CAATTATAAATCAAAAAGATTTATAATTG-3'  | 73.803 |
| 394 | 5'-CAATAATAAACAAAAAGTTTTATTATTG-3'   | 73.661 |
| 395 | 5'-CAAATTTATTTCAAAAAGAAATAAATTTG-3'  | 73.637 |
| 396 | 5'-CATTTTTTAAAACAAAAAGTTTTAAAAATG-3' | 73.448 |
| 397 | 5'-CATTATATTAACAAAAAGTTAATATAATG-3'  | 73.434 |
| 398 | 5'-CAAATTTATAACAAAAAGTTATAAATTTG-3'  | 73.397 |
| 399 | 5'-CATTTATAAATCAAAAAGATTTATAAATG-3'  | 73.387 |
| 400 | 5'-CAATTAATTTCAAAAAGAAATTTAATTTG-3'  | 73.341 |
| 401 | 5'-CAAATTATTTCAAAAAGAAATAATTTTG-3'   | 73.333 |
| 402 | 5'-CAATAAATTTACAAAAAGTAAATTTATTG-3'  | 73.33  |
| 403 | 5'-CATATTAATAACAAAAAGTTATTAATATG-3'  | 73.291 |
| 404 | 5'-CAAATATATAACAAAAAGTTATATATTTG-3'  | 73.26  |
| 405 | 5'-CAATTAATTTACAAAAAGTAAATTAATTTG-3' | 73.239 |
| 406 | 5'-CATATAAATAACAAAAAGTTATTTATATG-3'  | 73.143 |
| 407 | 5'-CAATTTAATTACAAAAAGTAATTAATTTG-3'  | 73.075 |
| 408 | 5'-CATAAATATTACAAAAAGTAATTTATG-3'    | 73.029 |
| 409 | 5'-CATATAAATTACAAAAAGTAATTTATATG-3'  | 72.984 |

|     |                                     |        |
|-----|-------------------------------------|--------|
| 410 | 5'-CAAAATTAATTCAAAAAGAATTAATTTTG-3' | 72.902 |
| 411 | 5'-CAATAAAATTACAAAAGTAATTTTATTG-3'  | 72.867 |
| 412 | 5'-CATTTAATTAACAAAAGTTAATTAATG-3'   | 72.864 |
| 413 | 5'-CATAATTATTACAAAAGTAATAATTATG-3'  | 72.837 |
| 414 | 5'-CATAATATATACAAAAGTATATATTATG-3'  | 72.729 |
| 415 | 5'-CATAAATTTAACAAAAGTTAAATTTATG-3'  | 72.652 |
| 416 | 5'-CAAAAATTTAACAAAAGTTAAATTTTG-3'   | 72.627 |
| 417 | 5'-CAATATTTTTTCAAAAAGAAAAATATTG-3'  | 72.582 |
| 418 | 5'-CATTAATTTTACAAAAGTAAAATTAATG-3'  | 72.508 |
| 419 | 5'-CAATTTTTTTTACAAAAGTAAAAAATTG-3'  | 72.444 |
| 420 | 5'-CATTTAATTTACAAAAGTAAATTAATG-3'   | 72.411 |
| 421 | 5'-CAATTTTTAATCAAAAAGATTAAAAATTG-3' | 72.387 |
| 422 | 5'-CAATATTATTACAAAAGTAATAATATTG-3'  | 72.358 |
| 423 | 5'-CAAAATATTTTCAAAAAGAAAATATTTTG-3' | 72.096 |
| 424 | 5'-CATTTTTTTAACAAAAGTTAAAAAATG-3'   | 72.08  |
| 425 | 5'-CATAAATAATACAAAAGTATTATTTATG-3'  | 71.97  |
| 426 | 5'-CAAATAATTTCAAAAAGAAATTATTTTG-3'  | 71.876 |
| 427 | 5'-CAATTTTAATTCAAAAAGAATTAATTTG-3'  | 71.875 |
| 428 | 5'-CAAAAAATAACAAAAGTTATTTTTTTG-3'   | 71.874 |
| 429 | 5'-CAAATTTAAACAAAAGTTTTAATTTTG-3'   | 71.852 |
| 430 | 5'-CAAATTTATTCAAAAAGAATAAATTTTG-3'  | 71.836 |
| 431 | 5'-CAAATTAATTACAAAAGTAATTAATTTG-3'  | 71.81  |
| 432 | 5'-CAAATATTATCAAAAAGATAATTTTTG-3'   | 71.778 |



|     |                                       |        |
|-----|---------------------------------------|--------|
| 433 | 5'-CAATATTTTTACAAAAAGTAAAAATATTG-3'   | 71.71  |
| 434 | 5'-CAATTTTAAATCAAAAAGATTTAAAATTG-3'   | 71.516 |
| 435 | 5'-CATTTTAAAAACAAAAAGTTTTTAAAATG-3'   | 71.492 |
| 436 | 5'-CAAATTTTTTTTCAAAAAGAAAAAATTTG-3'   | 71.4   |
| 437 | 5'-CATAAATTATACAAAAAGTATAATTTATG-3'   | 71.293 |
| 438 | 5'-CAAATTTTTTTACAAAAAGTAAAAAATTTG-3'  | 71.135 |
| 439 | 5'-CATTATAATTACAAAAAGTAATTATAATG-3'   | 71.046 |
| 440 | 5'-CAAAAATATTTCAAAAAGAAATATTTTTG-3'   | 71.028 |
| 441 | 5'-CAATTTTATTTCAAAAAGAAATAAAATTG-3'   | 70.998 |
| 442 | 5'-CATTTAAATAACAAAAAGTTATTTAAATG-3'   | 70.997 |
| 443 | 5'-CAATTAATAATTCAAAAAGAATTTTAATTG-3'  | 70.759 |
| 444 | 5'-CAAATAATTTACAAAAAGTAAATTATTTG-3'   | 70.652 |
| 445 | 5'-CAAAATTTTTACAAAAAGTAAAAATTTG-3'    | 70.619 |
| 446 | 5'-CAAAAAATAATCAAAAAGATTATTTTTTG-3'   | 70.617 |
| 447 | 5'-CATTTTAATAACAAAAAGTTATTTAAATG-3'   | 70.348 |
| 448 | 5'-CAAAATAAAATCAAAAAGATTTTATTTTG-3'   | 70.146 |
| 449 | 5'-CAATAATTTTACAAAAAGTAAAATTATTG-3'   | 70.138 |
| 450 | 5'-CATAATAAAAACAAAAAGTTTTTATTATG-3'   | 70.091 |
| 451 | 5'-CATAATTAATACAAAAAGTATTAATTATG-3'   | 70.032 |
| 452 | 5'-CAATTAATAATTACAAAAAGTAATTTAATTG-3' | 69.755 |
| 453 | 5'-CATAATTATAACAAAAAGTTATAATTATG-3'   | 69.75  |
| 454 | 5'-CATTTTAATTACAAAAAGTAATTTAAATG-3'   | 69.684 |
| 455 | 5'-CAATAATAATTCAAAAAGAATTATTATTG-3'   | 69.622 |

|     |                                     |        |
|-----|-------------------------------------|--------|
| 456 | 5'-CATAAATTTTACAAAAAGTAAAATTTATG-3' | 69.548 |
| 457 | 5'-CAAAAAAATTTCAAAAAGAAATTTTTTTG-3' | 69.421 |
| 458 | 5'-CATATAATTTACAAAAAGTAAATTATATG-3' | 69.362 |
| 459 | 5'-CATTATTTAAACAAAAAGTTTAAATAATG-3' | 69.315 |
| 460 | 5'-CATATATTTTACAAAAAGTAAAATATATG-3' | 69.271 |
| 461 | 5'-CAAATTTAAATCAAAAAGATTTAAATTTG-3' | 69.227 |
| 462 | 5'-CATATTAATAACAAAAAGTATTTAATATG-3' | 69.118 |
| 463 | 5'-CAATTTTTTAACAAAAAGTTAAAAAATTG-3' | 69.028 |
| 464 | 5'-CAAAATATAATCAAAAAGATTATATTTTG-3' | 68.946 |
| 465 | 5'-CATTTTATATTCAAAAAGAATATAAAATG-3' | 68.818 |
| 466 | 5'-CATAATATTAACAAAAAGTTAATATTATG-3' | 68.669 |
| 467 | 5'-CATTTTAAATACAAAAAGTATTTAAAATG-3' | 68.499 |
| 468 | 5'-CATTTATTTAACAAAAAGTTAAATAAATG-3' | 68.455 |
| 469 | 5'-CATAATATTTACAAAAAGTAAATATTATG-3' | 68.285 |
| 470 | 5'-CAAAAAAAAATCAAAAAGATTTTTTTTTG-3' | 68.142 |
| 471 | 5'-CAAAATTAATCAAAAAGATTTAATTTTG-3'  | 68.097 |
| 472 | 5'-CATTTATATTTCAAAAAGAAATATAAATG-3' | 67.832 |
| 473 | 5'-CAAATTAATCAAAAAGATTTTAATTTG-3'   | 67.582 |
| 474 | 5'-CAAAAATTTTTCAAAAAGAAAAATTTTTG-3' | 67.371 |
| 475 | 5'-CATATAATATACAAAAAGTATATTATATG-3' | 67.336 |
| 476 | 5'-CAATAATAATACAAAAAGTATTATTATTG-3' | 67.255 |
| 477 | 5'-CATTTTTTTTACAAAAAGTAAAAAAATG-3'  | 67.035 |
| 478 | 5'-CAATTTTTTATCAAAAAGATAAAAAATTG-3' | 66.377 |

|     |                                      |        |
|-----|--------------------------------------|--------|
| 479 | 5'-CAAAAATTATACAAAAAGTATAATTTTTTG-3' | 66.158 |
| 480 | 5'-CATTATTATTACAAAAAGTAATAATAATG-3'  | 65.9   |
| 481 | 5'-CAAAAAAAAAACAAAAAGTTTTTTTTTTTG-3' | 65.45  |
| 482 | 5'-CATTATTTATACAAAAAGTATAAATAATG-3'  | 65.389 |
| 483 | 5'-CATTTTTTTATCAAAAAAGTAAAAAAAATG-3' | 64.944 |
| 484 | 5'-CAAATATAAAACAAAAAGTTTTATATTTG-3'  | 63.478 |
| 485 | 5'-CAATAAAAAACAAAAAGTTTTTTTATTG-3'   | 63.15  |
| 486 | 5'-CAAATTTATTACAAAAAGTAATAAATTTG-3'  | 62.583 |
| 487 | 5'-CAATTATTTATCAAAAAAGATAAATAATTG-3' | 62.225 |
| 488 | 5'-CAAATTTATACAAAAAGTATAAATTTTG-3'   | 61.688 |
| 489 | 5'-CAATTTTTATACAAAAAGTATAAAAATTG-3'  | 61.036 |
| 490 | 5'-CAAATTTTTTCAAAAAAGAAAAATTTTG-3'   | 60.89  |
| 491 | 5'-CATTTAAATATCAAAAAAGATATTTAAATG-3' | 60     |
| 492 | 5'-CAATTTATTTTCAAAAAAGAAAATAAATTG-3' | 59.784 |
| 493 | 5'-CATTTATAAAACAAAAAGTTTATAAATG-3'   | 59.729 |
| 494 | 5'-CATTTTTTAATCAAAAAAGATTAAAAAATG-3' | 59.546 |
| 495 | 5'-CATTTATTTATCAAAAAAGATAAATAAATG-3' | 59.35  |
| 496 | 5'-CATTTAATATACAAAAAAGTATATTAATG-3'  | 59.326 |
| 497 | 5'-CATTTAATAATCAAAAAAGATTATTAATG-3'  | 58.75  |
| 498 | 5'-CATTTTTATATCAAAAAAGATATAAAAATG-3' | 57.265 |
| 499 | 5'-CAAATTAATAACAAAAAGTTATTAATTTG-3'  | 56.521 |
| 500 | 5'-CAATATATTTTCAAAAAAGAAATATATTG-3'  | 55.031 |
| 501 | 5'-CAATTTAAAAACAAAAAGTTTTTAAATTG-3'  | 53.252 |

|     |                                     |        |
|-----|-------------------------------------|--------|
| 502 | 5'-CATTTAAATTTCAAAAAGAAATTTAAATG-3' | 52.038 |
| 503 | 5'-CATTTAATATTCAAAAAGAATATTAATG-3'  | 48.761 |
| 504 | 5'-CAATAAAAATACAAAAGTATTTTTATTG-3'  | 48.756 |
| 505 | 5'-CATTTTTTTTTCAAAAAGAAAAAAAAATG-3' | 47.955 |
| 506 | 5'-CAATTTTATATCAAAAAGATATAAAATTG-3' | 45.379 |
| 507 | 5'-CAATTTATTATCAAAAAGATAATAAATTG-3' | 45.312 |
| 508 | 5'-CAAATTTTAAACAAAAGTTAAAAATTTG-3'  | 44.013 |
| 509 | 5'-CAAAAAAATATCAAAAAGATATTTTTTTG-3' | 43.936 |
| 510 | 5'-CAAATTATTAACAAAAGTTAATAATTTG-3'  | 43.455 |
| 511 | 5'-CAATTAATAAACAAAAGTTTATTAATTG-3'  | 42.366 |
| 512 | 5'-CAAAAATTTTCAAAAAGAAAATTTTTTG-3'  | 39.385 |
|     |                                     |        |

**The top 24 sequences:**

|                               |                               |
|-------------------------------|-------------------------------|
| CAATTTTATACAAAAAGTATAAAAATTG  | CAATTTAAAAACAAAAAGTTTTTAAATTG |
| CAAAATTTTTTCAAAAAGAAAAATTTTG  | CATTTAAATTTCAAAAAGAAATTTAAATG |
| CATTTAAATATCAAAAAGATATTTAAATG | CATTTAATATTCAAAAAGAATATTAATG  |
| CAATTTATTTTCAAAAAGAAAATAAATTG | CAATAAAAATACAAAAAGTATTTTTATTG |
| CATTTATAAAACAAAAAGTTTTATAAATG | CATTTTTTTTTCAAAAAGAAAAAAAATG  |
| CATTTTTTAATCAAAAAGATTAATAAATG | CAATTTTATATCAAAAAGATATAAAATTG |
| CATTTATTATCAAAAAGATAATAAATG   | CAATTTATTATCAAAAAGATAATAAATTG |
| CATTTAATATACAAAAAGTATATTAATG  | CAAATTTTTAACAAAAAGTTAAAAATTTG |
| CATTTAATAATCAAAAAGATTATTAATG  | CAAAAAAATATCAAAAAGATATTTTTTTG |
| CATTTTTATATCAAAAAGATATAAAAATG | CAAATTATTAACAAAAAGTTAATAATTTG |
| CAAATTAATAACAAAAAGTTATTAATTTG | CAATTAATAAACAAAAAGTTTATTAATTG |
| CAATATATTTTCAAAAAGAAAATATATTG | CAAAAAATTTTCAAAAAGAAAATTTTTTG |

**Table S3.** List of the top 24 highest affinity sequences from the FID assay of 512 DNA hairpin oligonucleotides.

Derivation of p value for 86 transitions in the “top 24” sequences.

$N = 216$  (number of transitions in the top 24 = 9 x 24)

$m = 86 / 216 =$  (probability of a switch in the top 24)

$m_0 = 0.5$  (expected probability if no correlation)

$s = \sqrt{m_0 (1-m_0) / N} = 0.034$  (standard deviation of the mean)

$z = |m_0 - m| / s = 2.99$  (z score for the observed mean = # of standard deviations from the expected mean)

$p = 1 - (1 + \text{erf}(z)) / 2$  (p value for observing the z score, if transitions were random)=0.001%
